# Supplementary material for: Pigeons (Columba livia) as Trainable Observers of Pathology and Radiology Breast Cancer Images
Source: PubMed Central journal article supplement (PMC4651348; doi:10.1371/journal.pone.0141357), 2015-11-18

# 4x Normal Set A

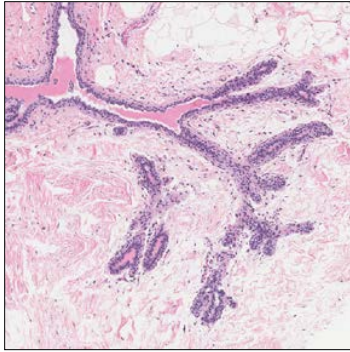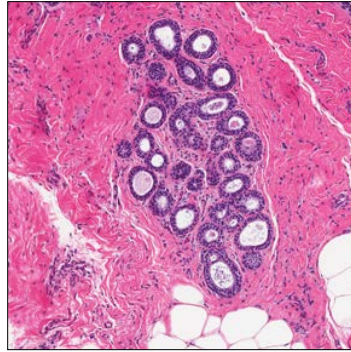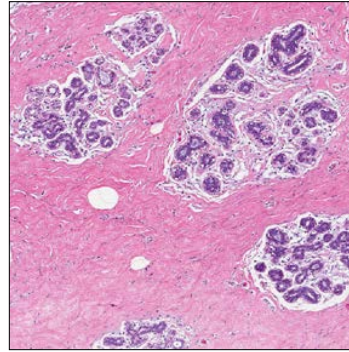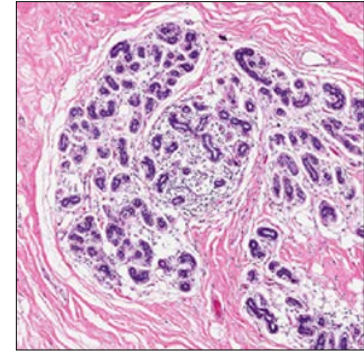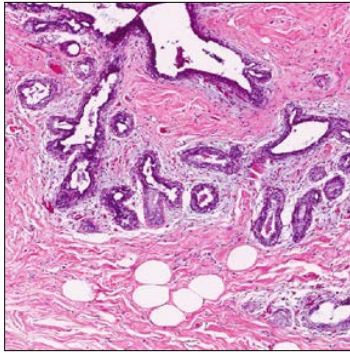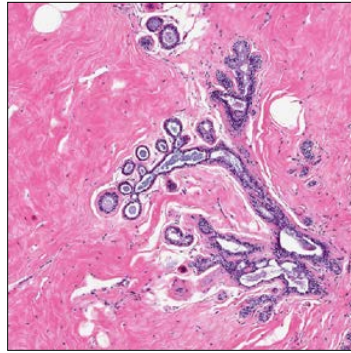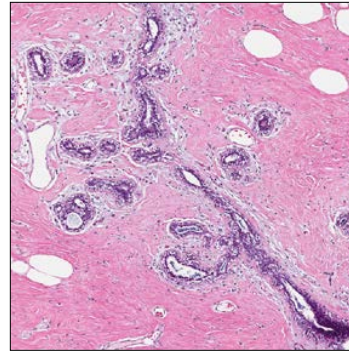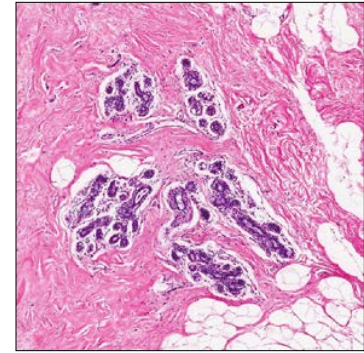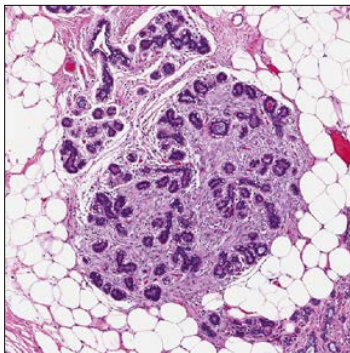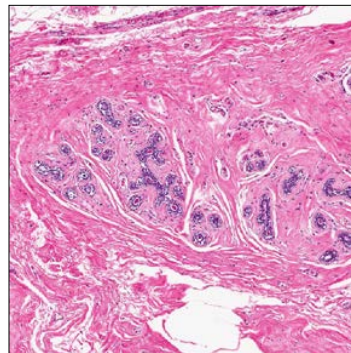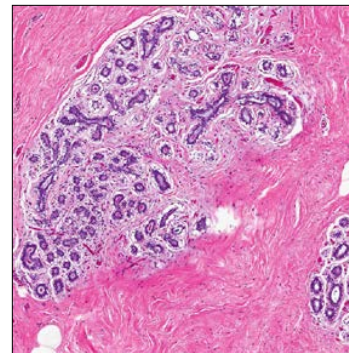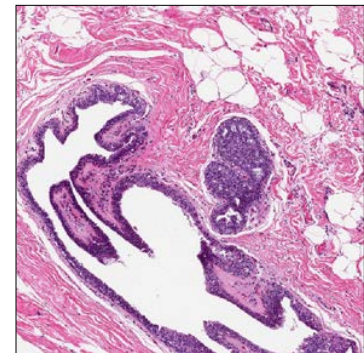







# 4x CA Set A

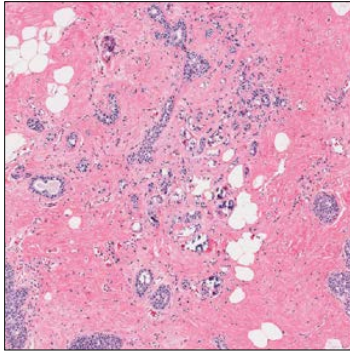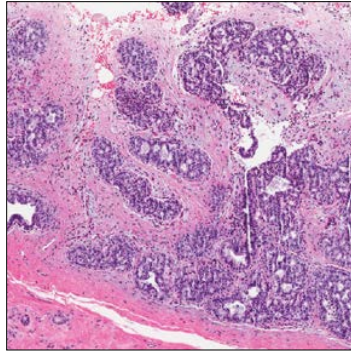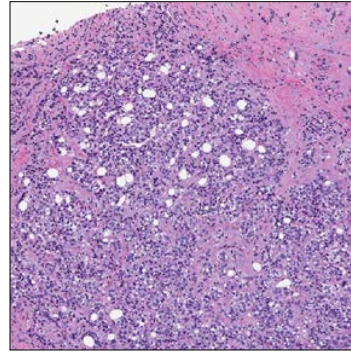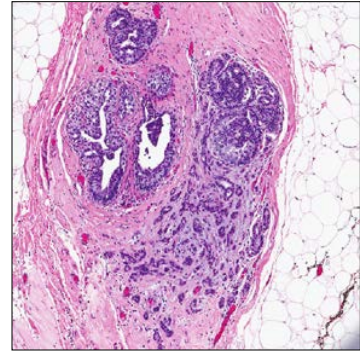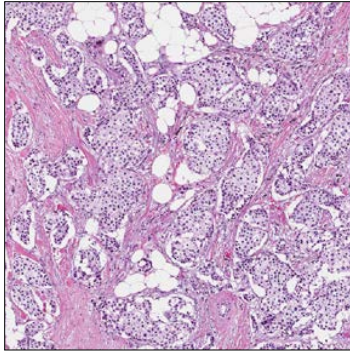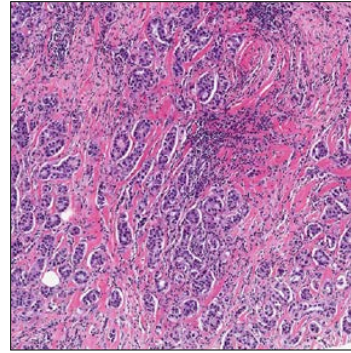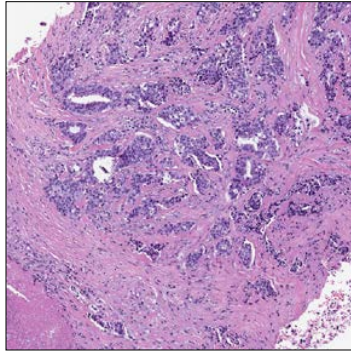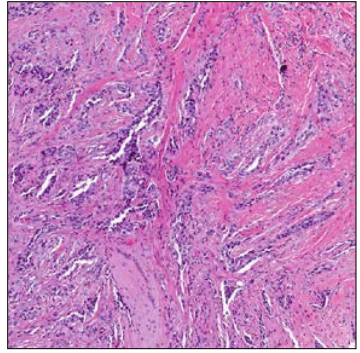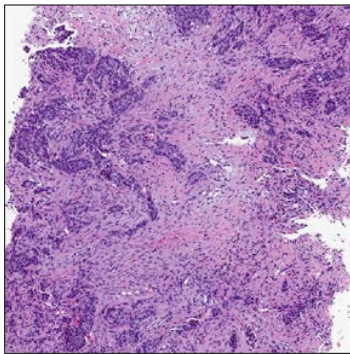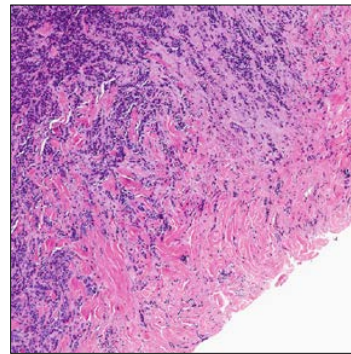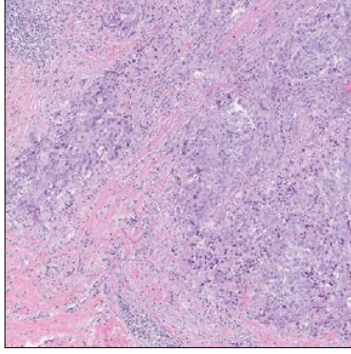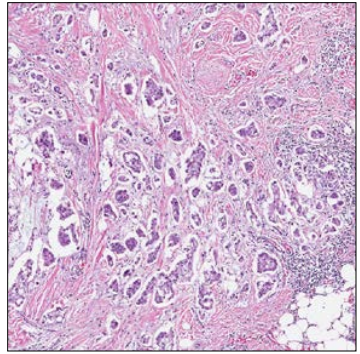



# 4x CA Set B

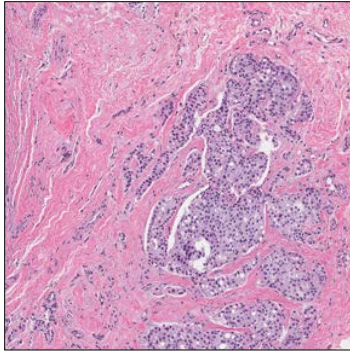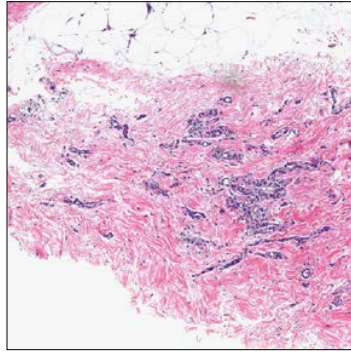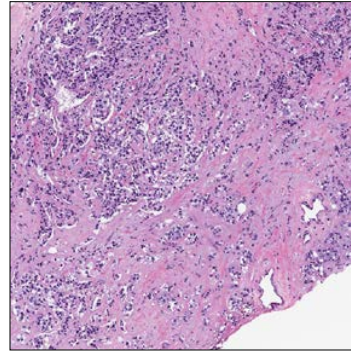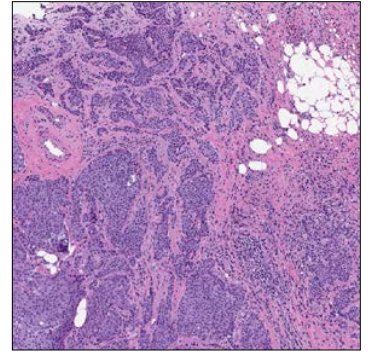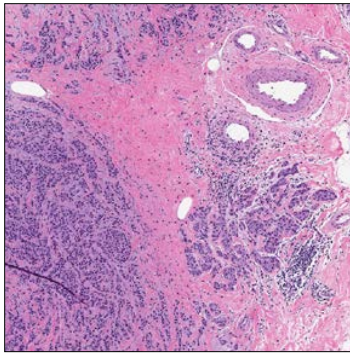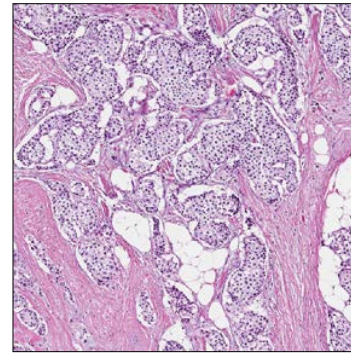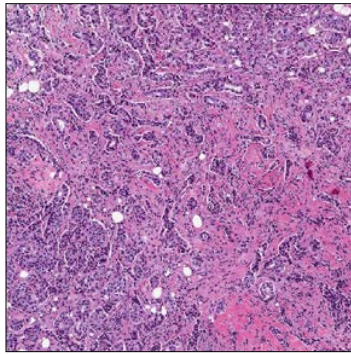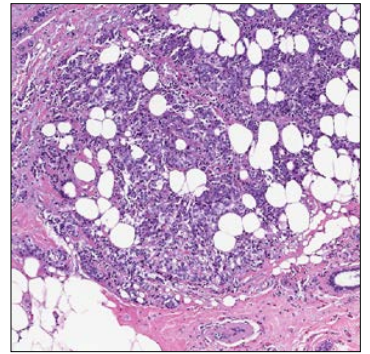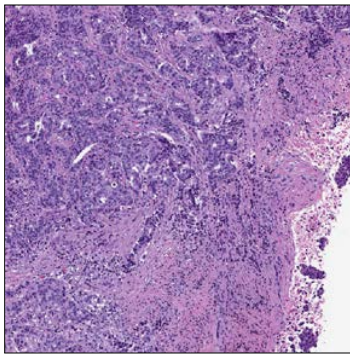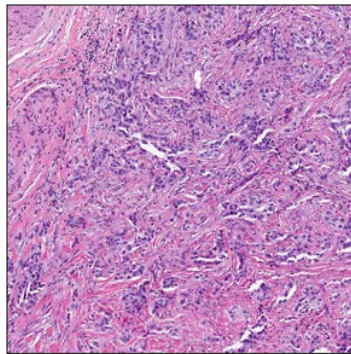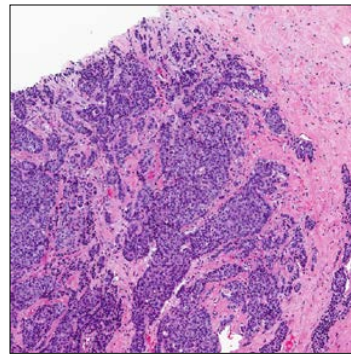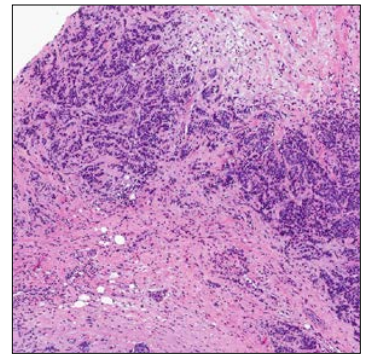



# 10x Normal Set A

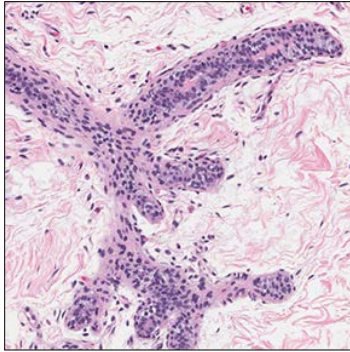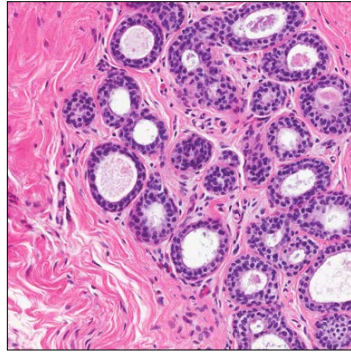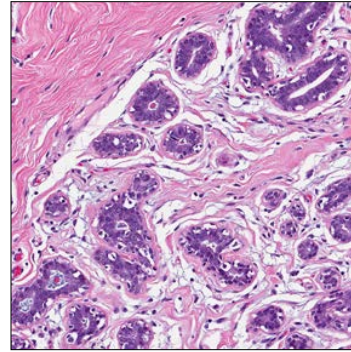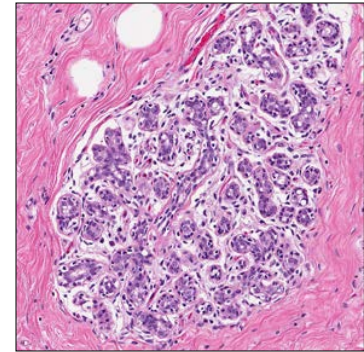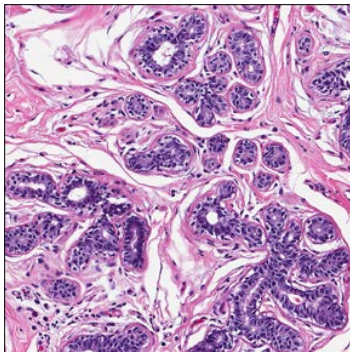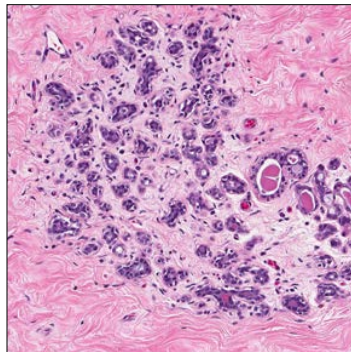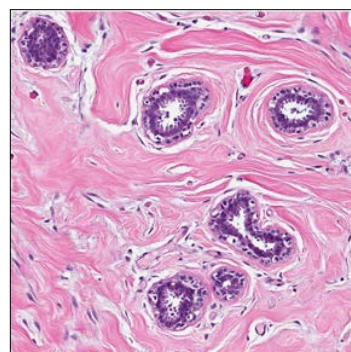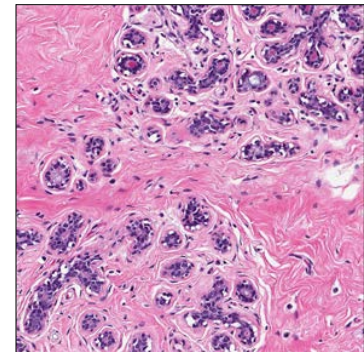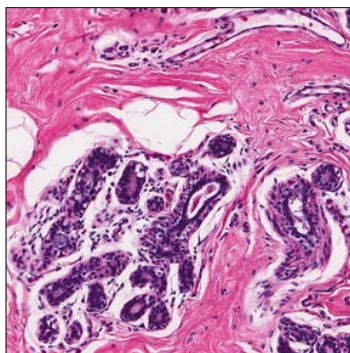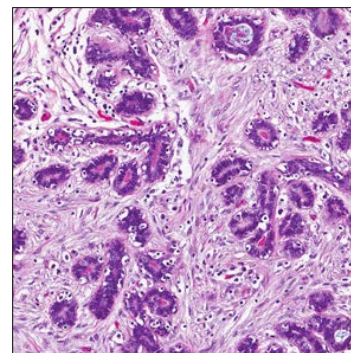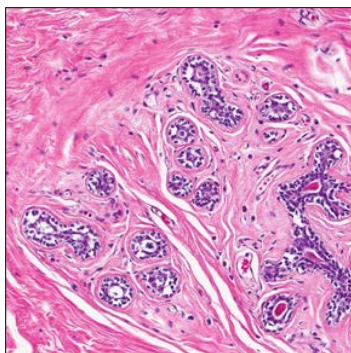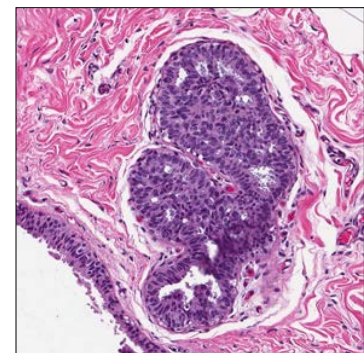



# 10x Normal Set B

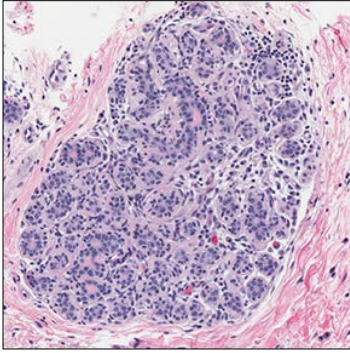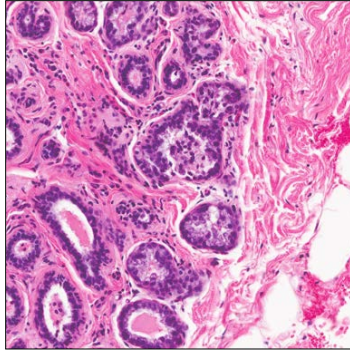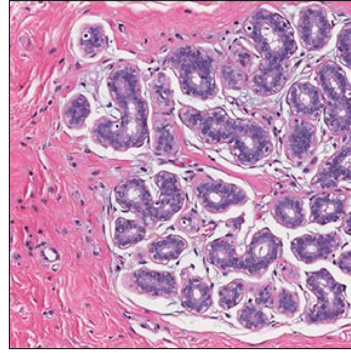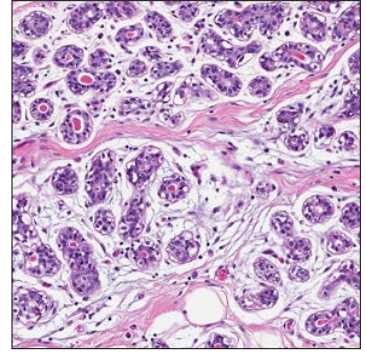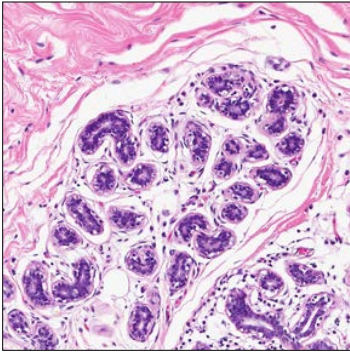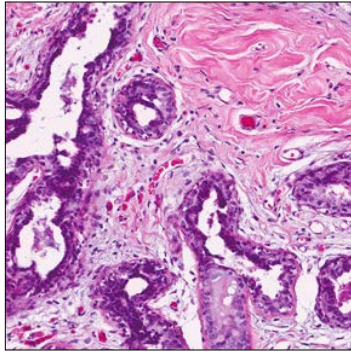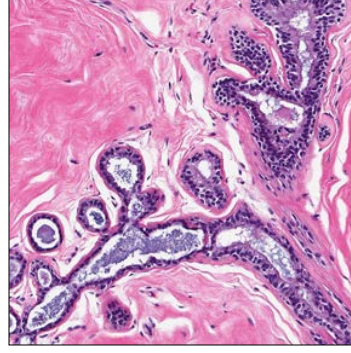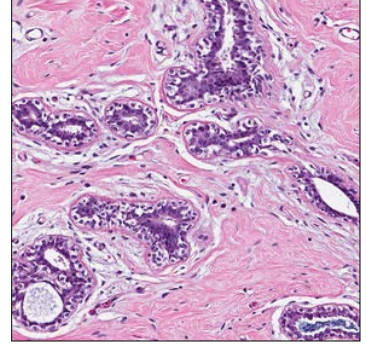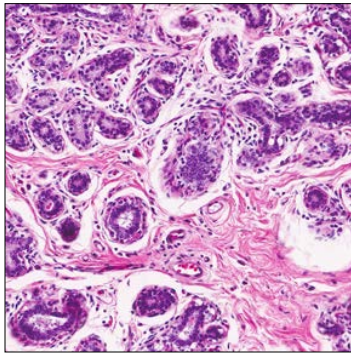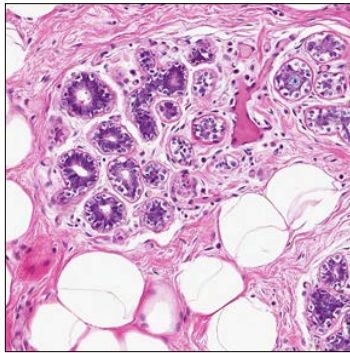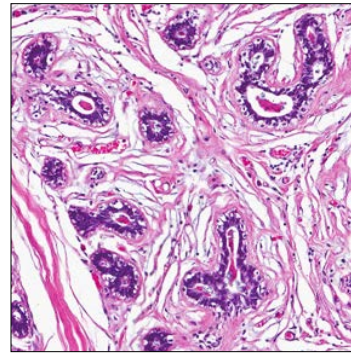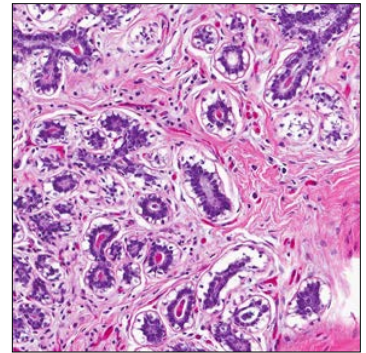



# 10x CA Set A

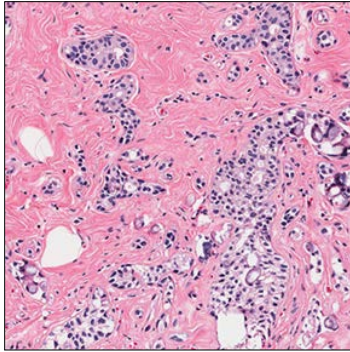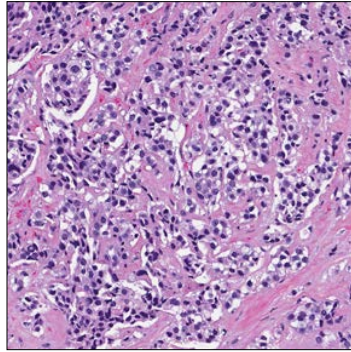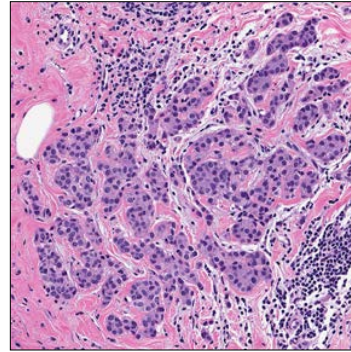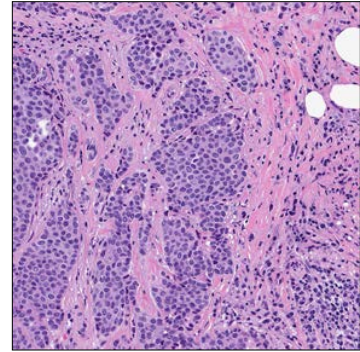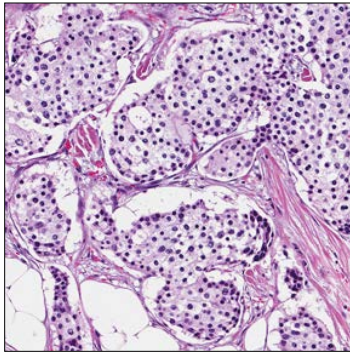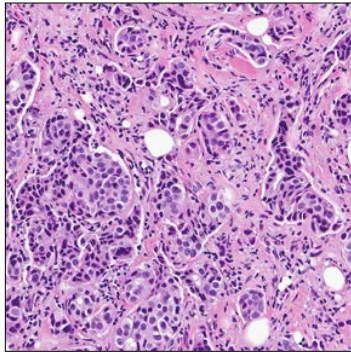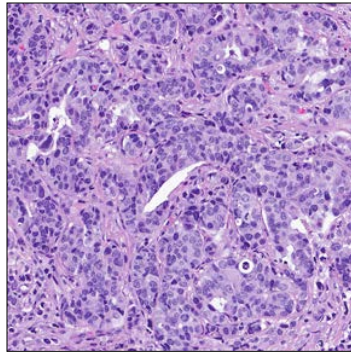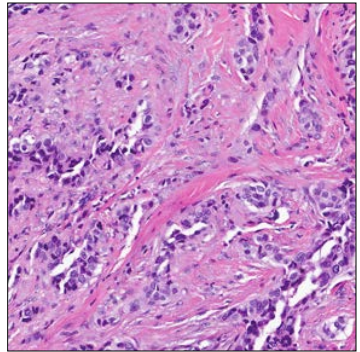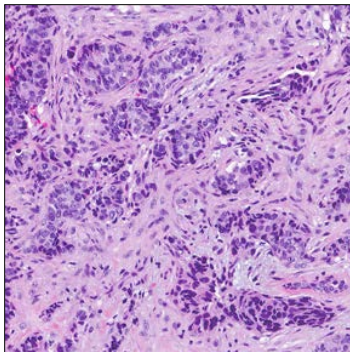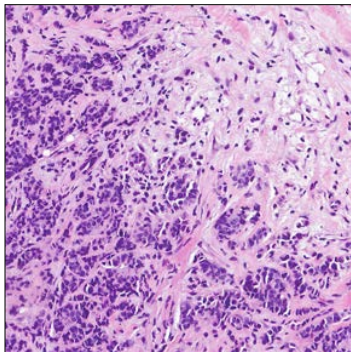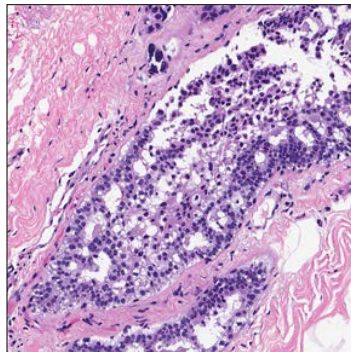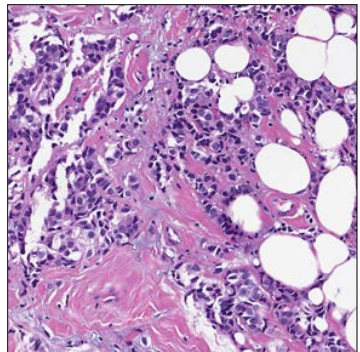



# 10x CA Set B

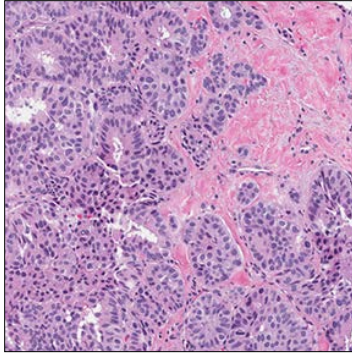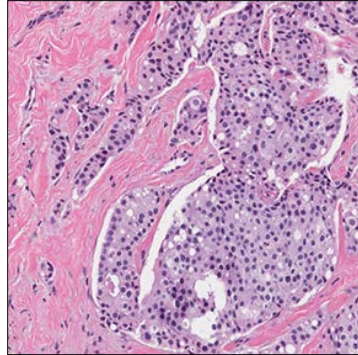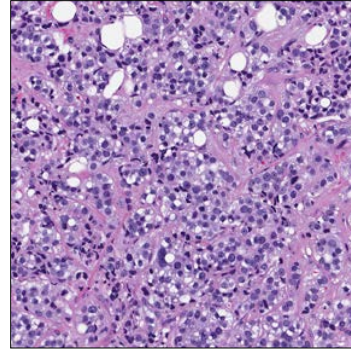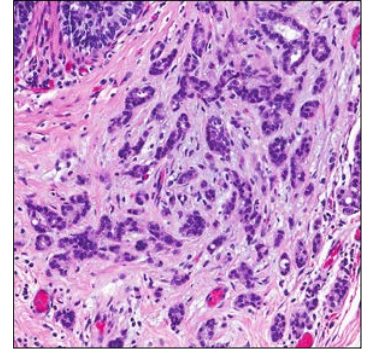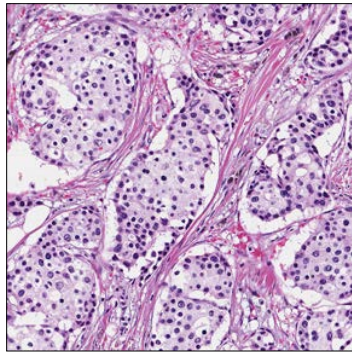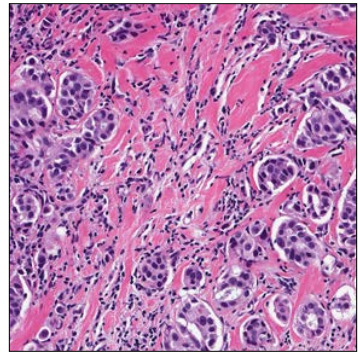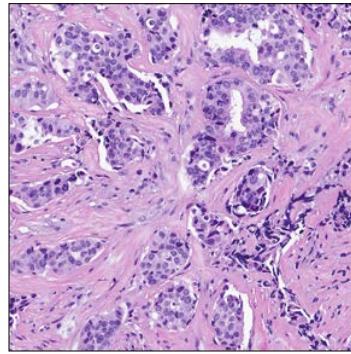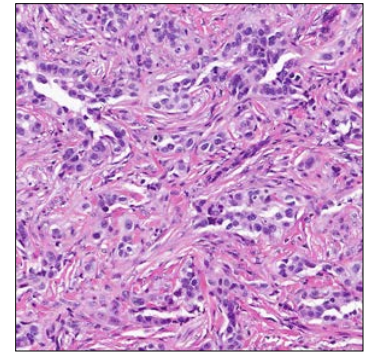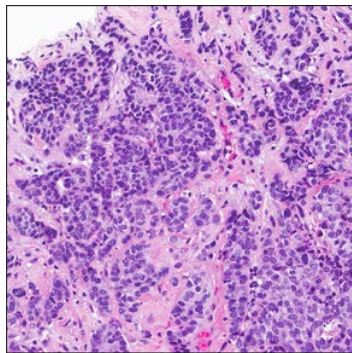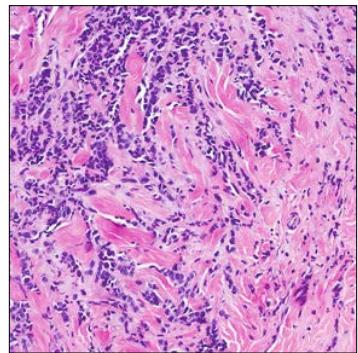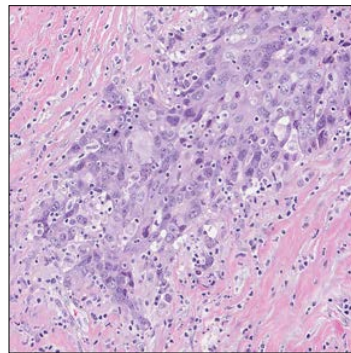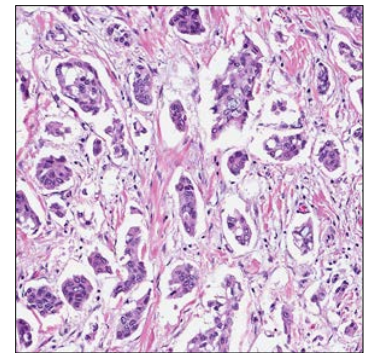



# 20x Normal Set A

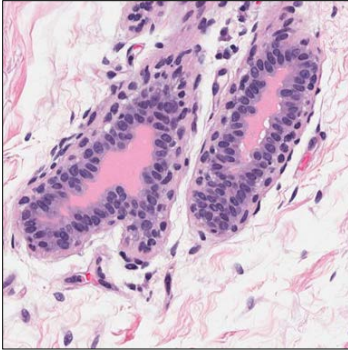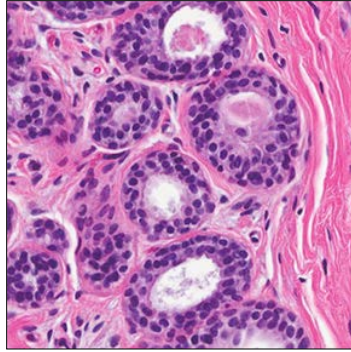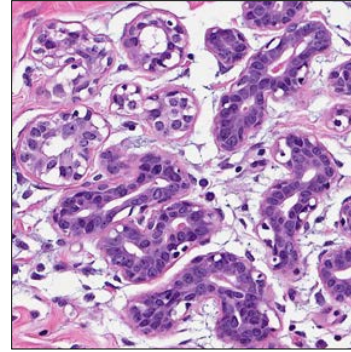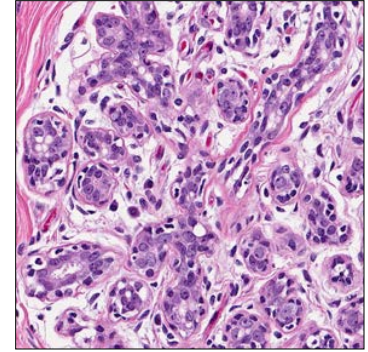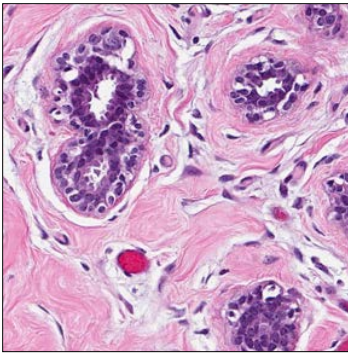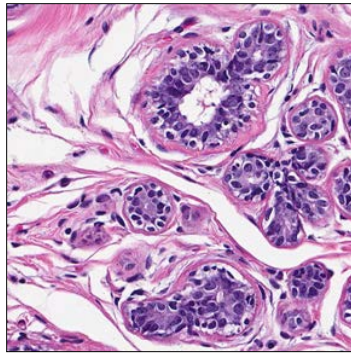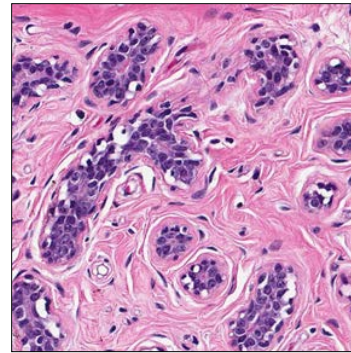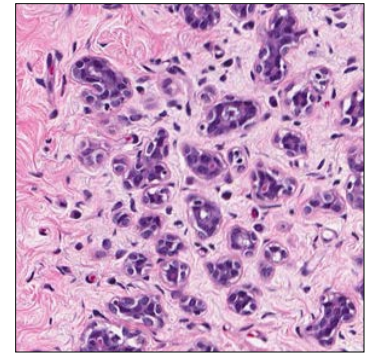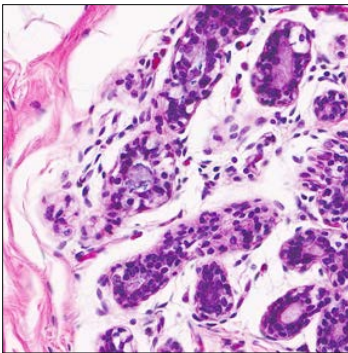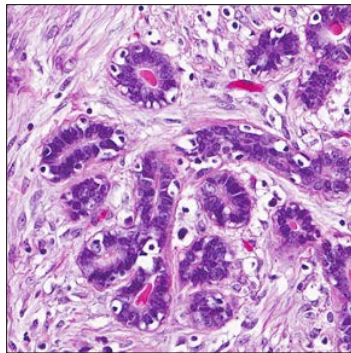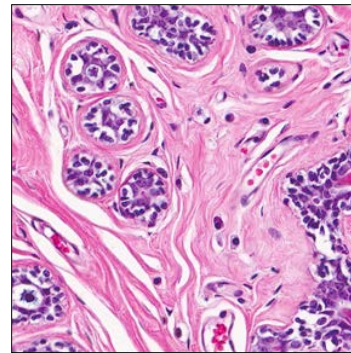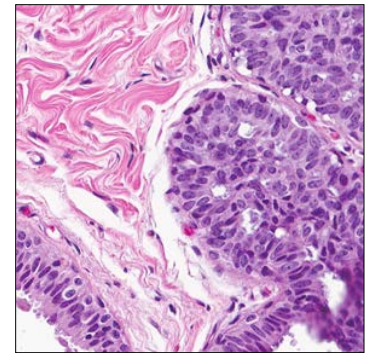



# 20x Normal Set B

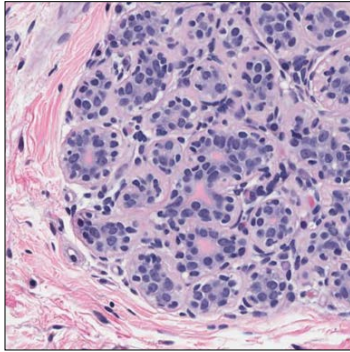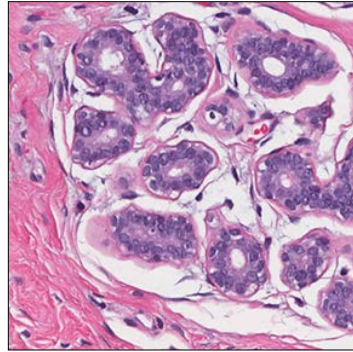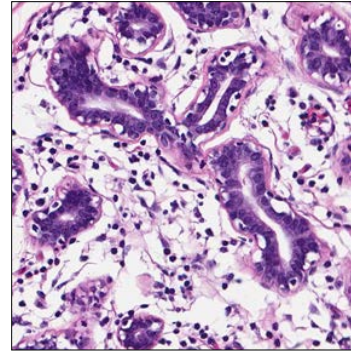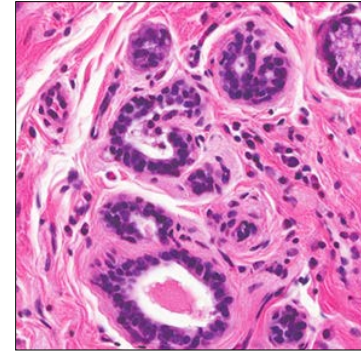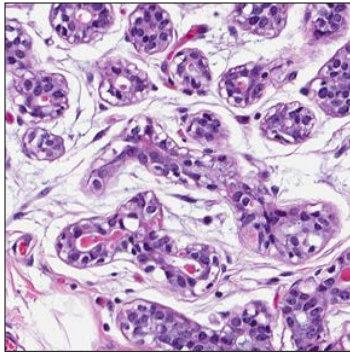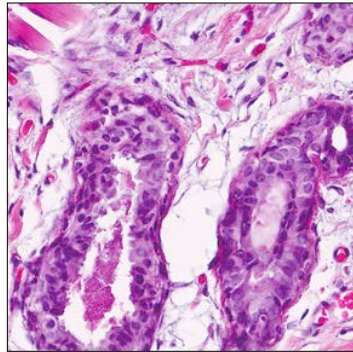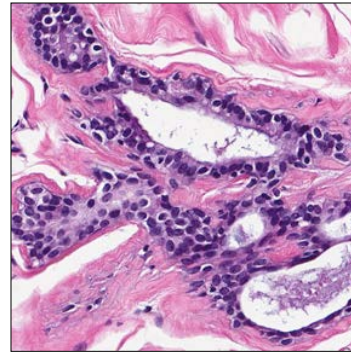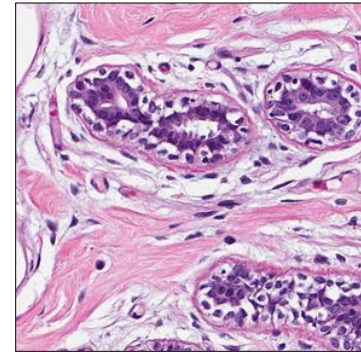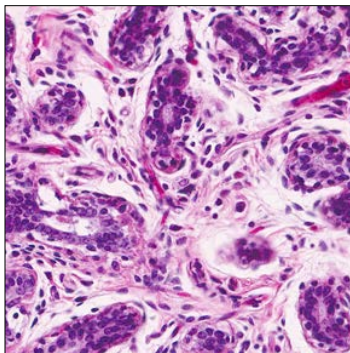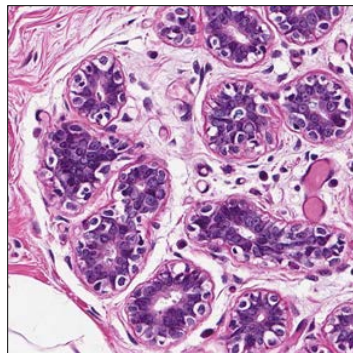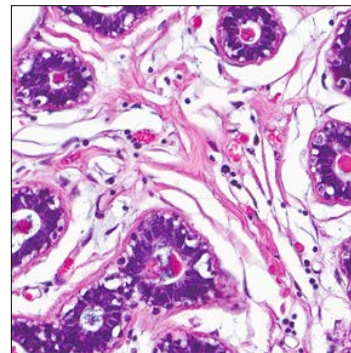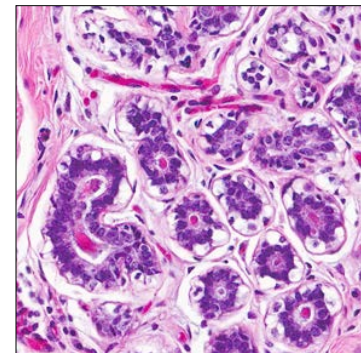



20x CA Set A

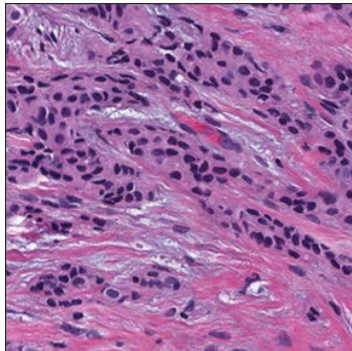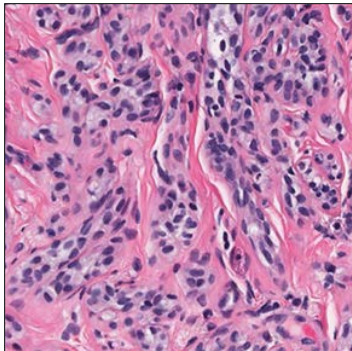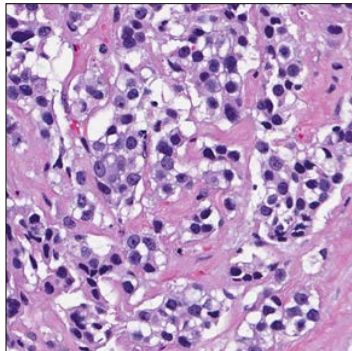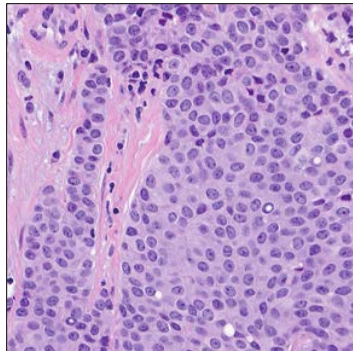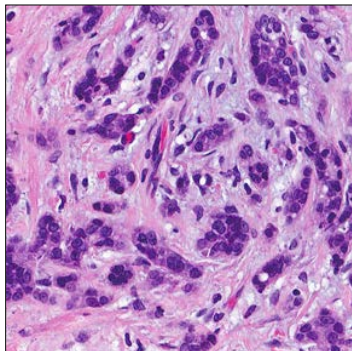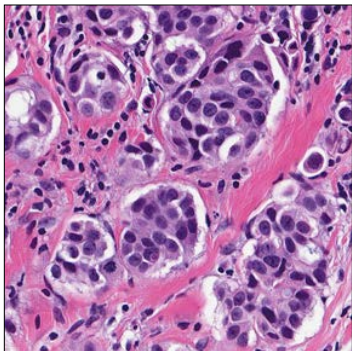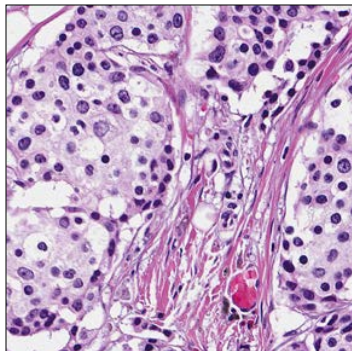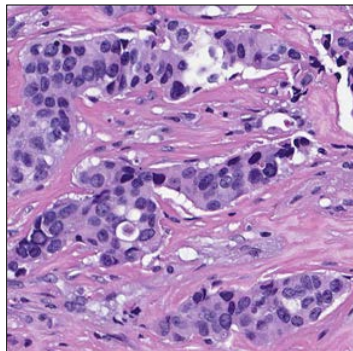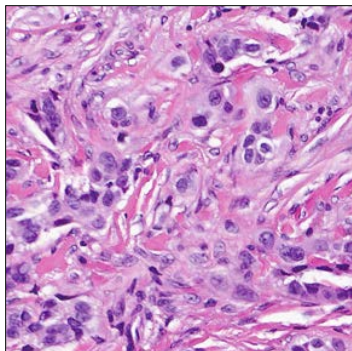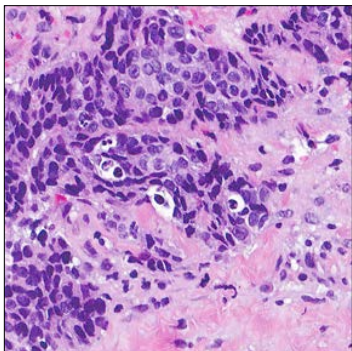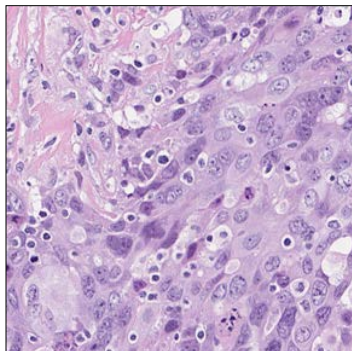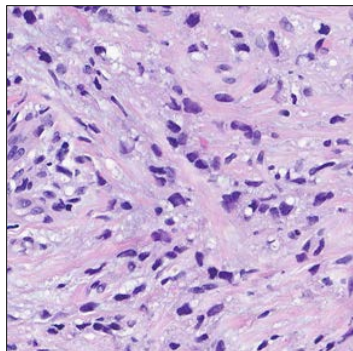



20x CA Set B

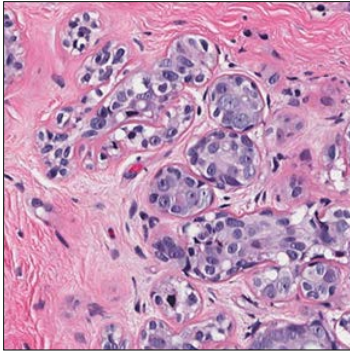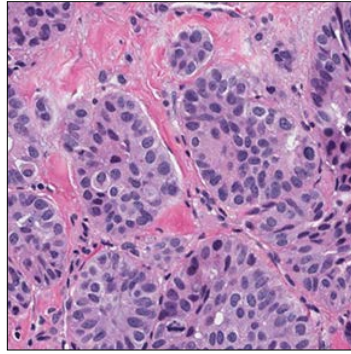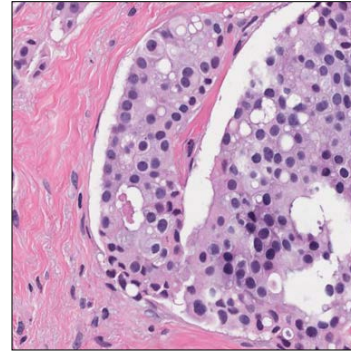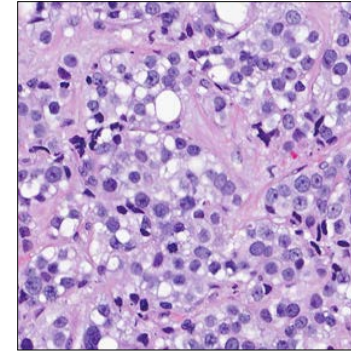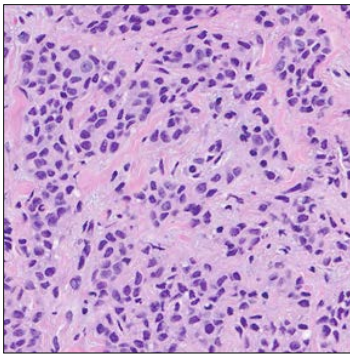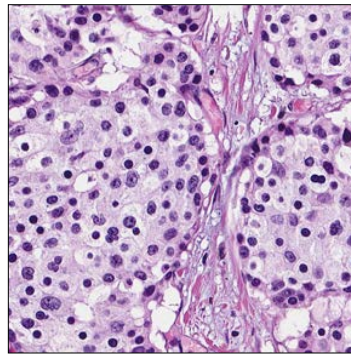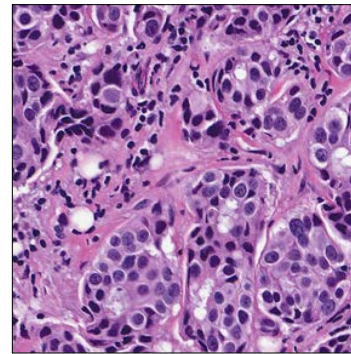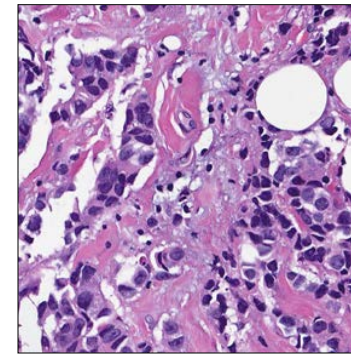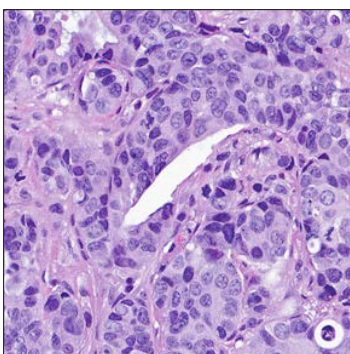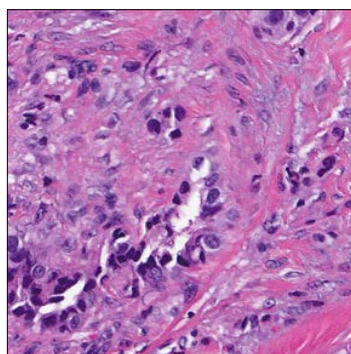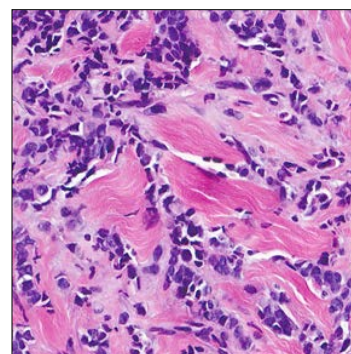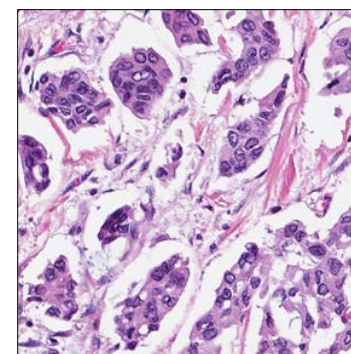







# 10x Normal Monochrome Set B

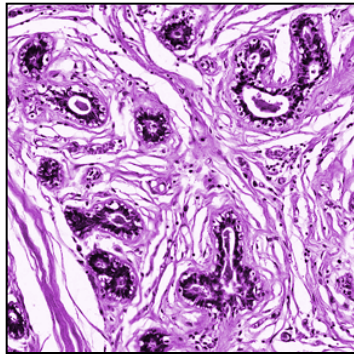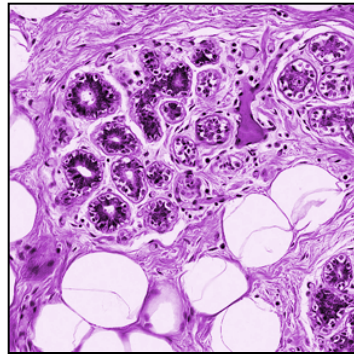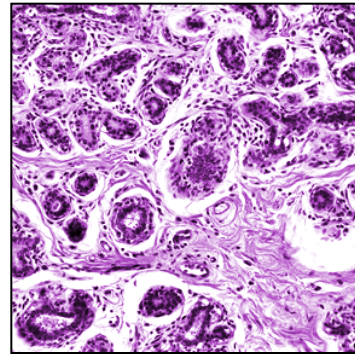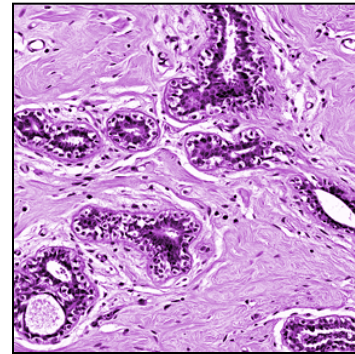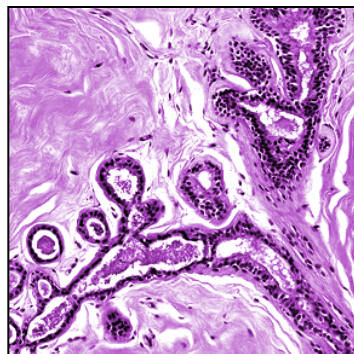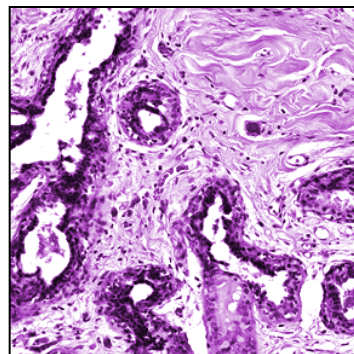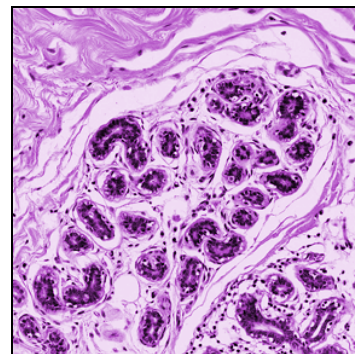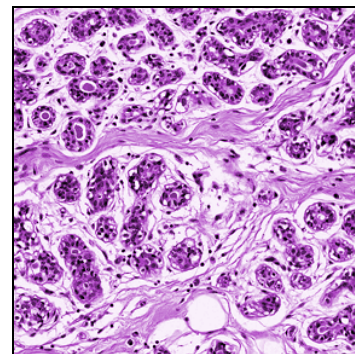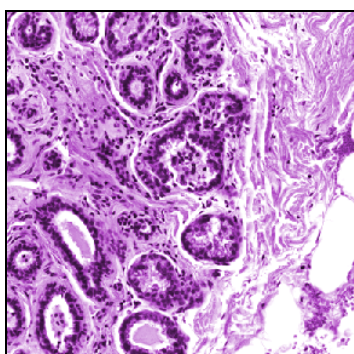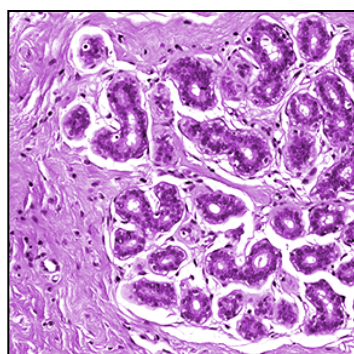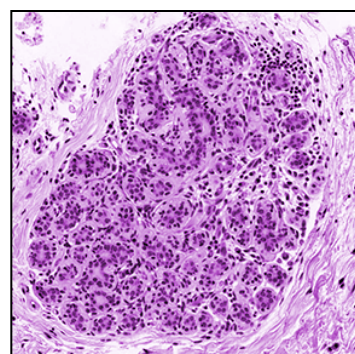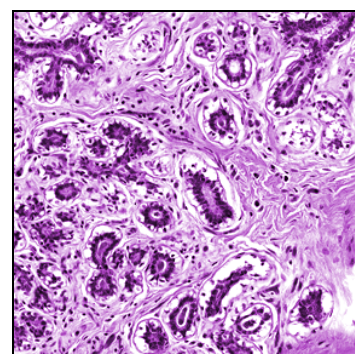







# 10x Cancer Monochrome Set B

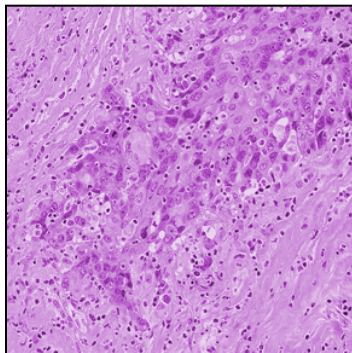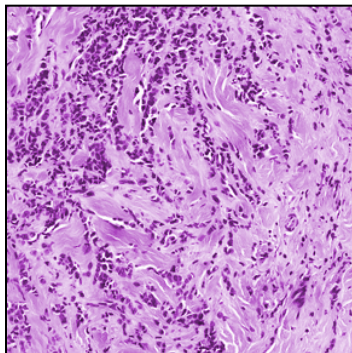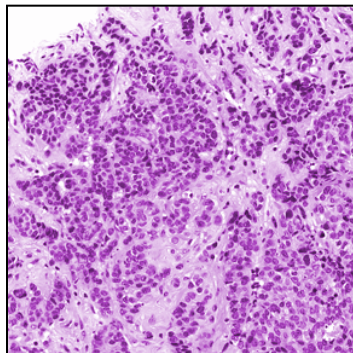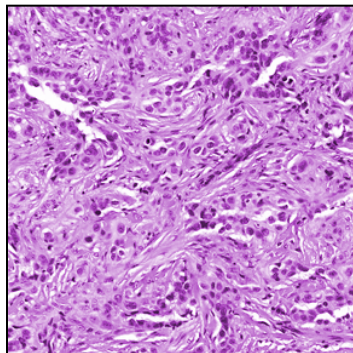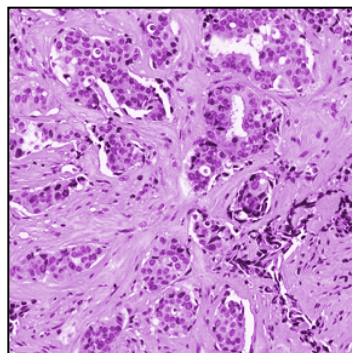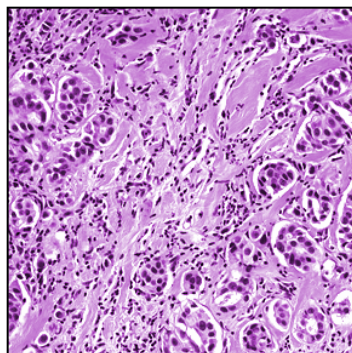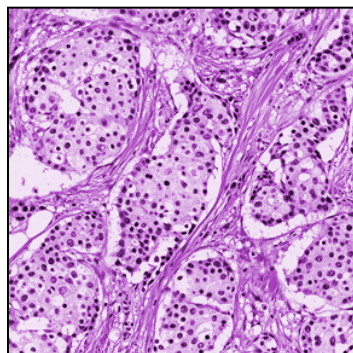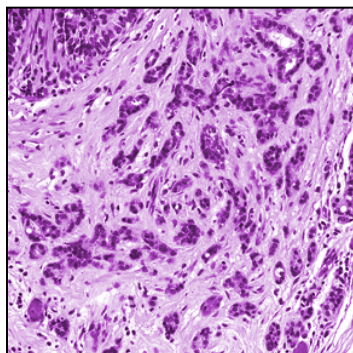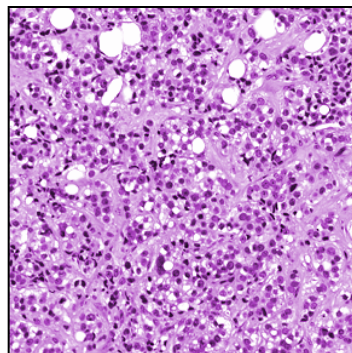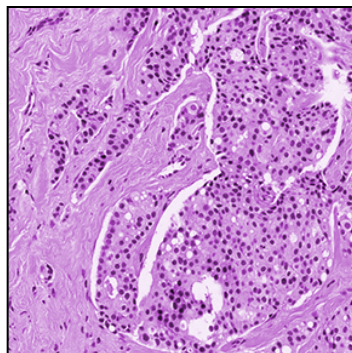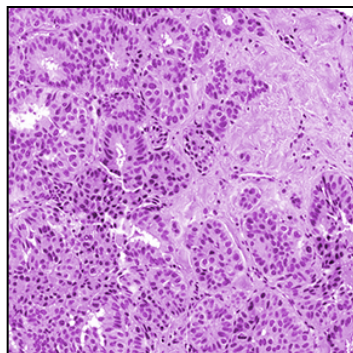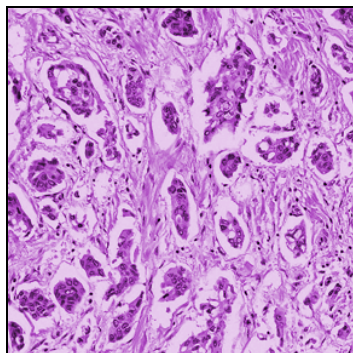



10x Normal Monochrome 1:15 JPEG Set A

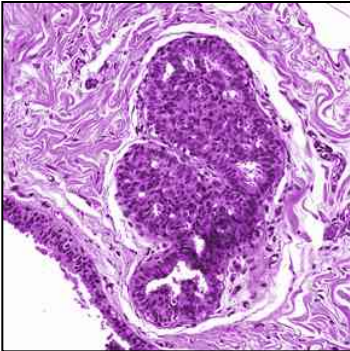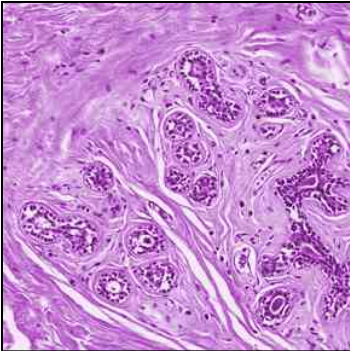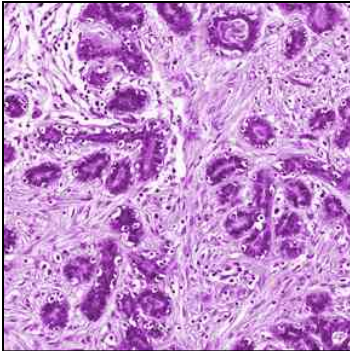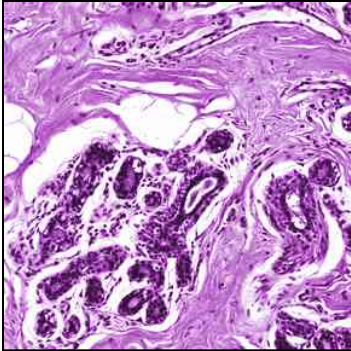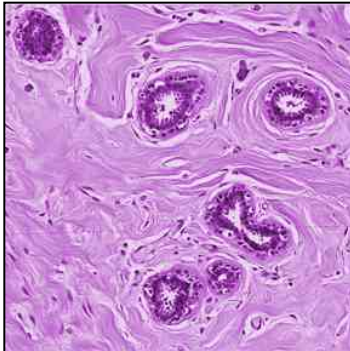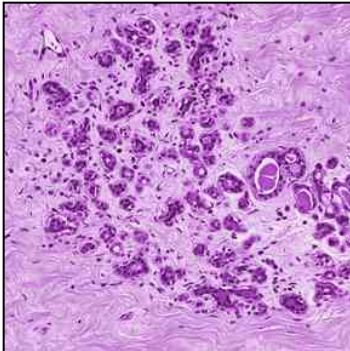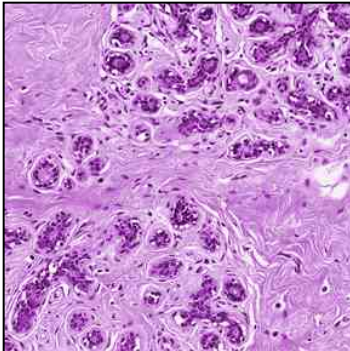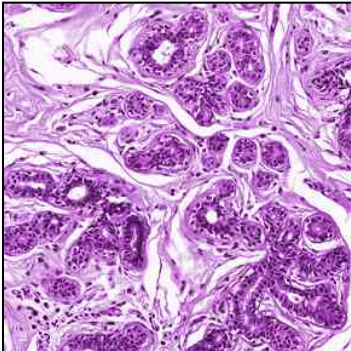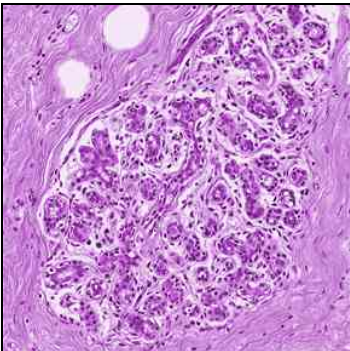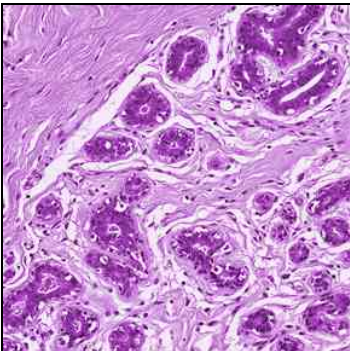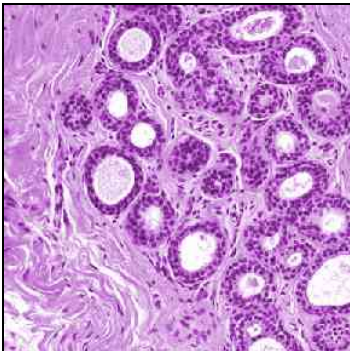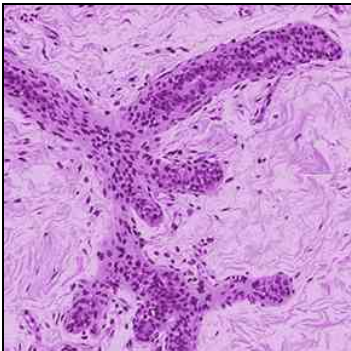



10x Normal Monochrome 1:15 JPEG Set B

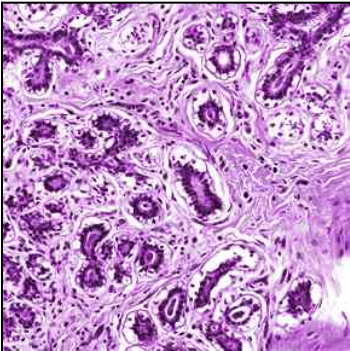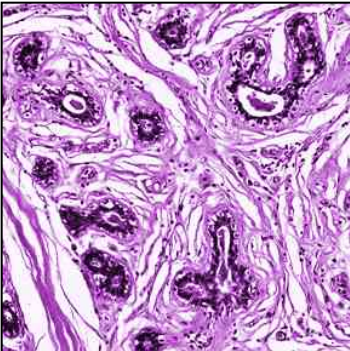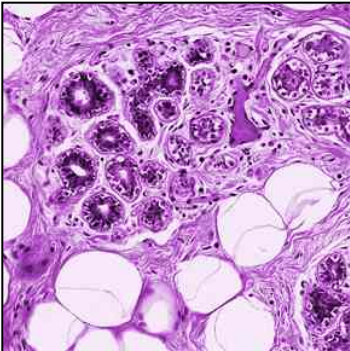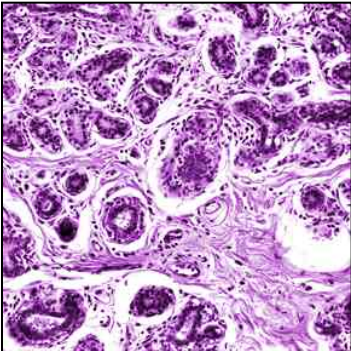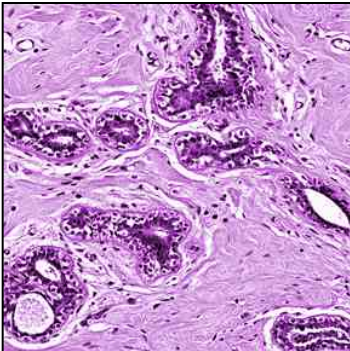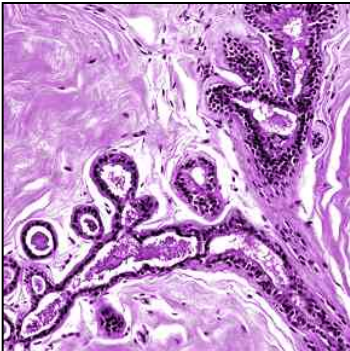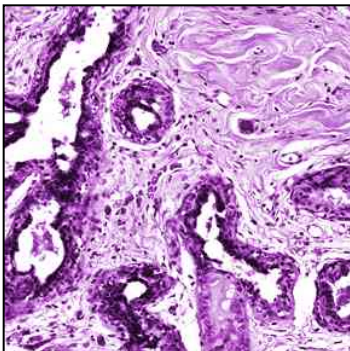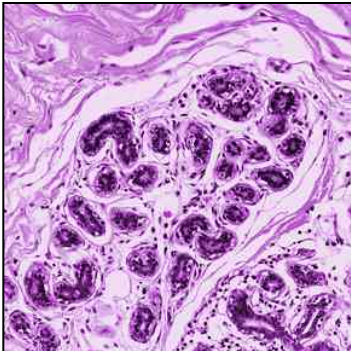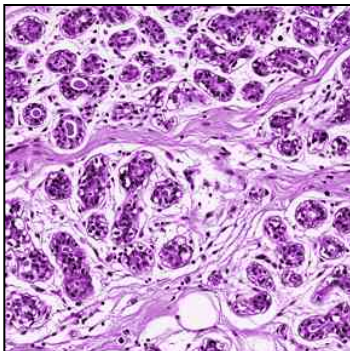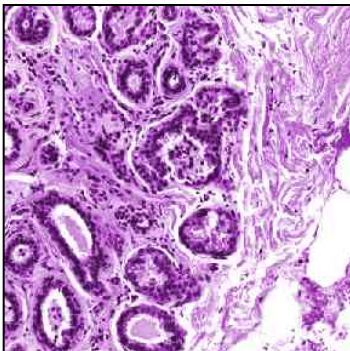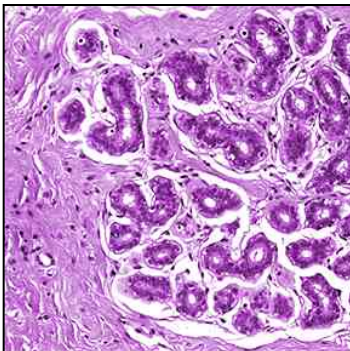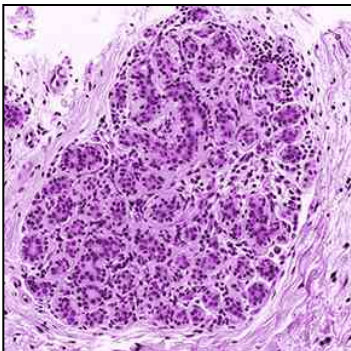



10x Cancer Monochrome 1:15 JPEG Set A

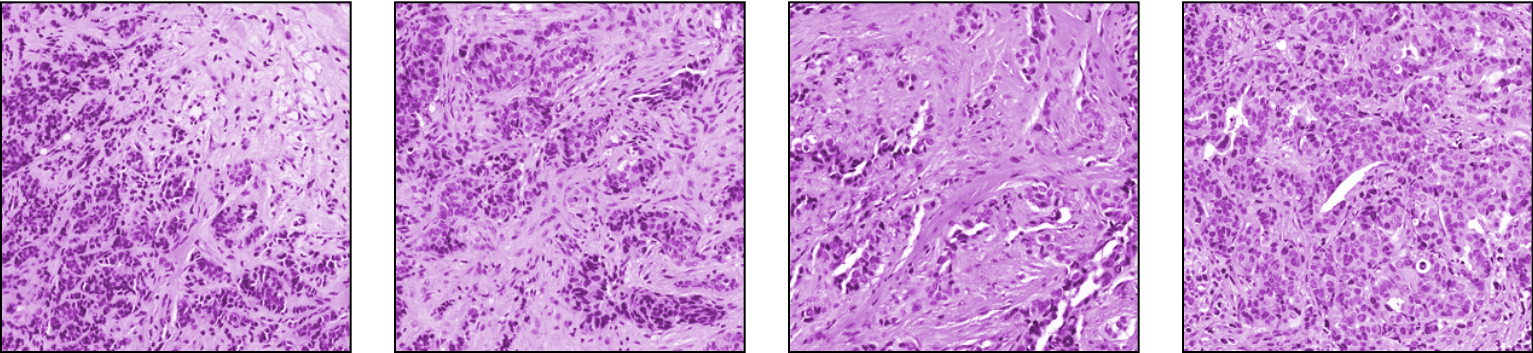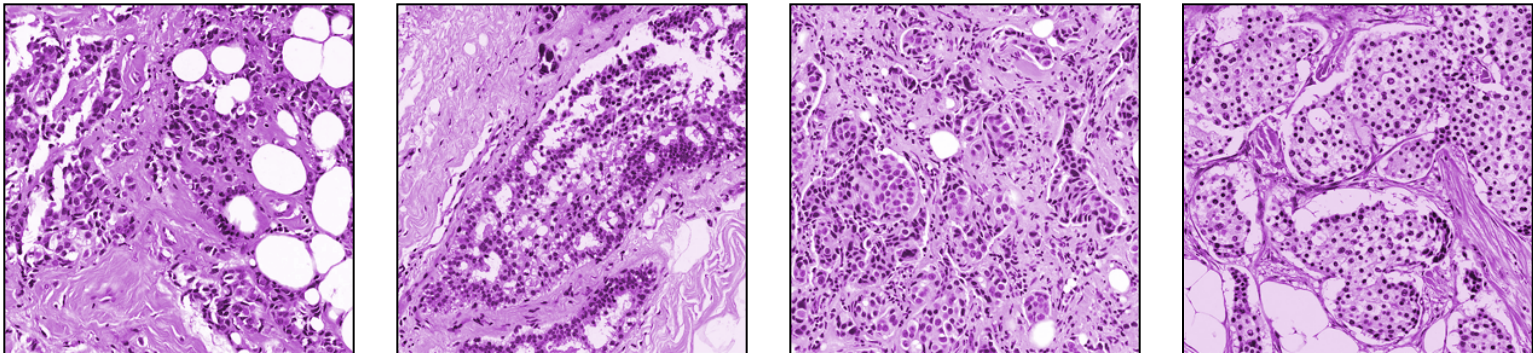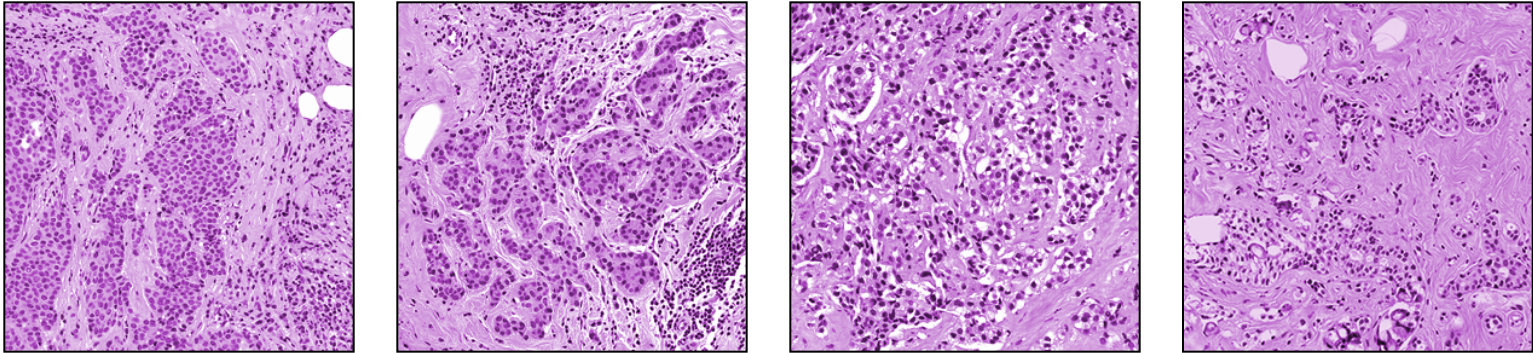



10x Cancer Monochrome 1:15 JPEG Set B

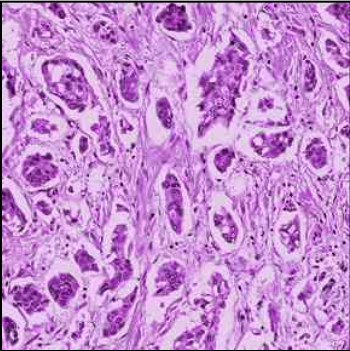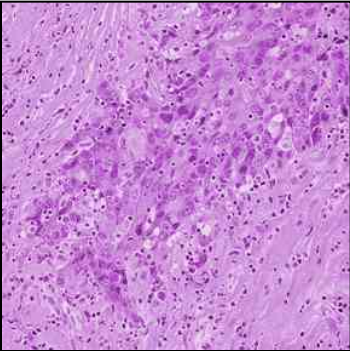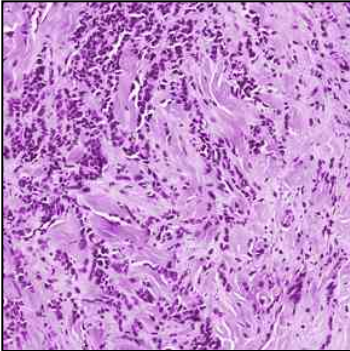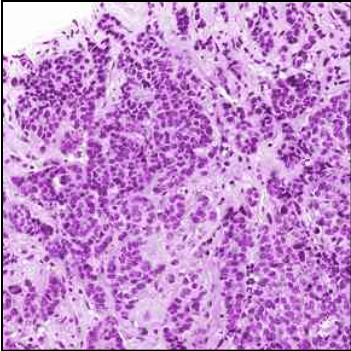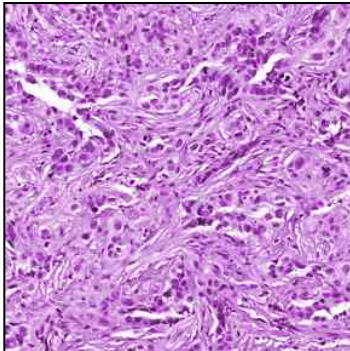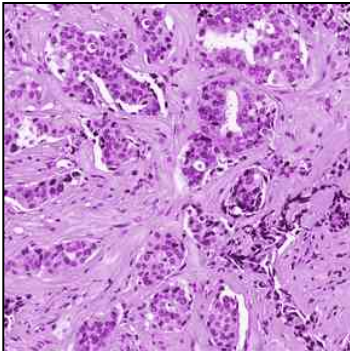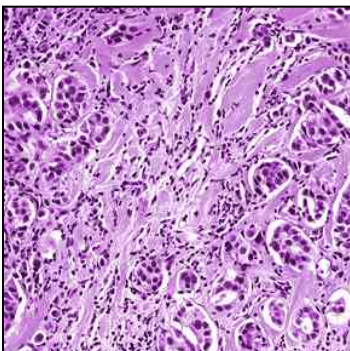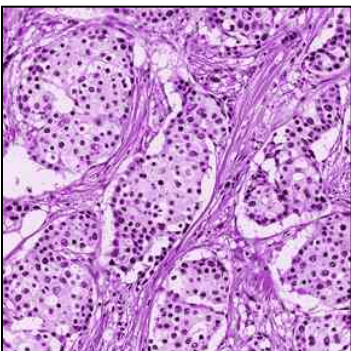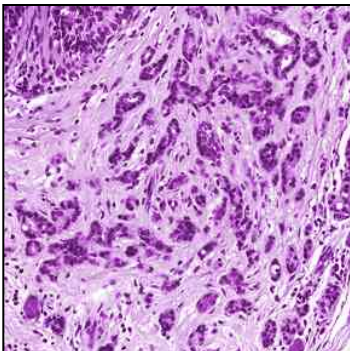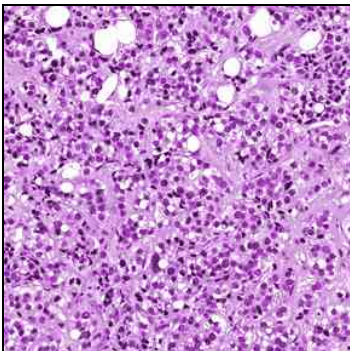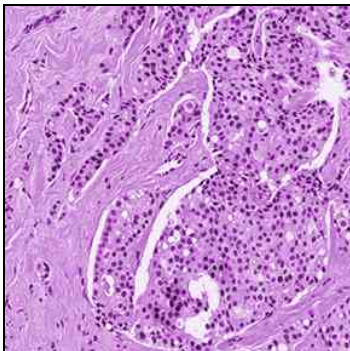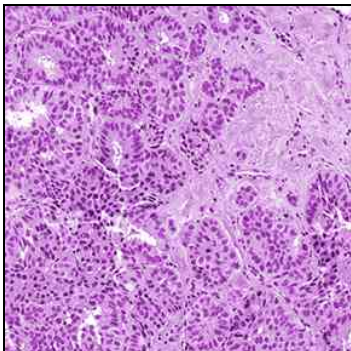



10x Normal Monochrome 1:27 JPEG Set A

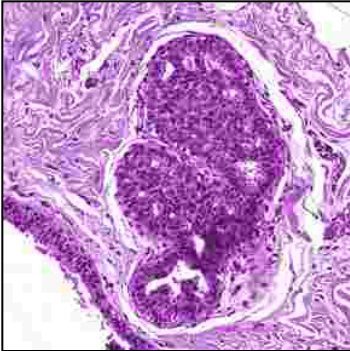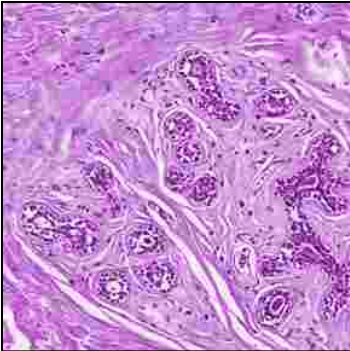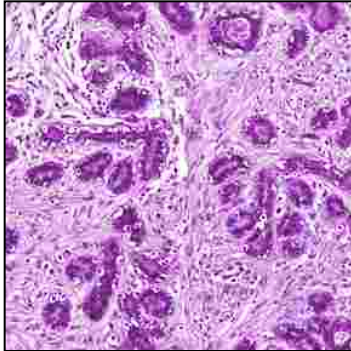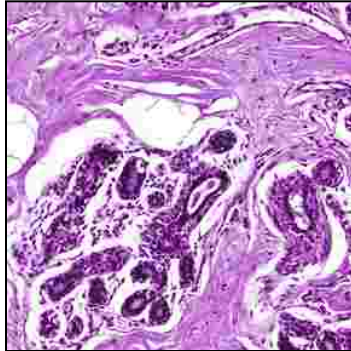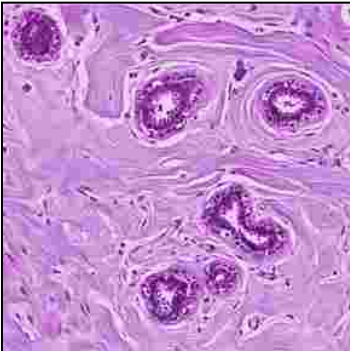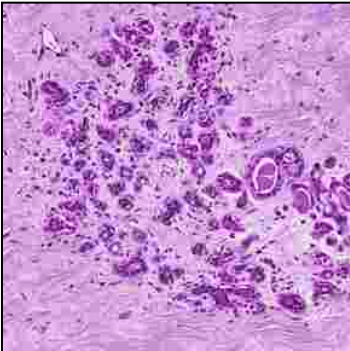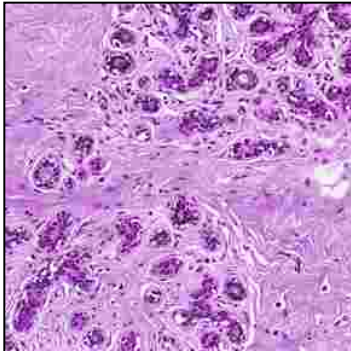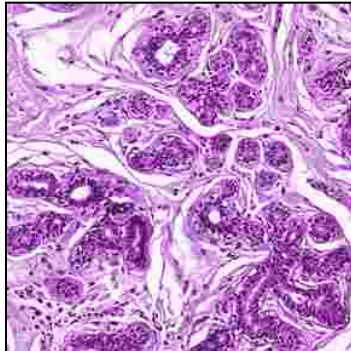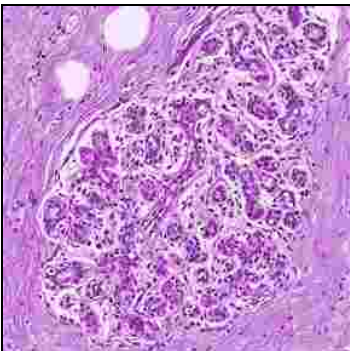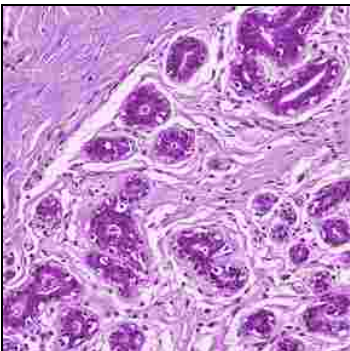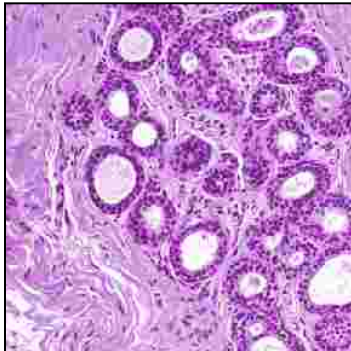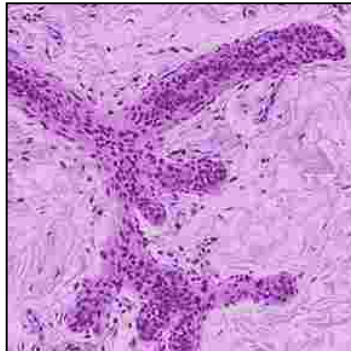



10x Normal Monochrome 1:27 JPEG Set B

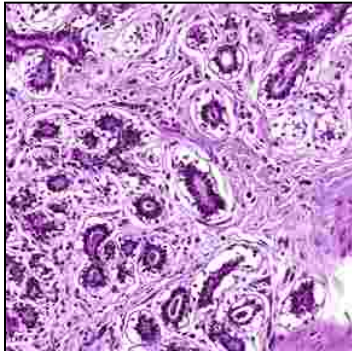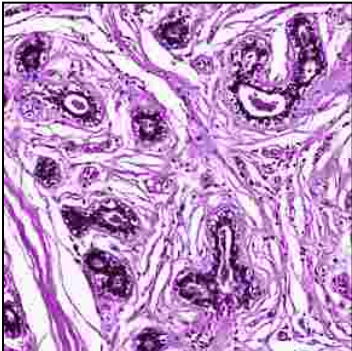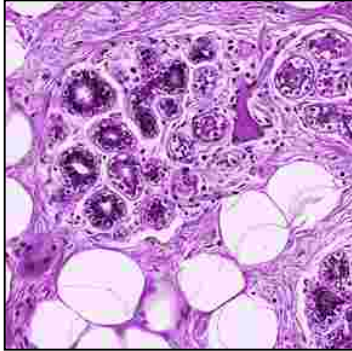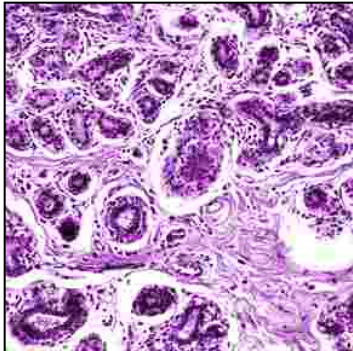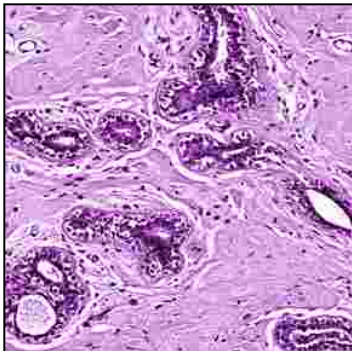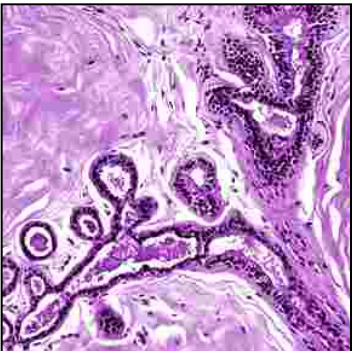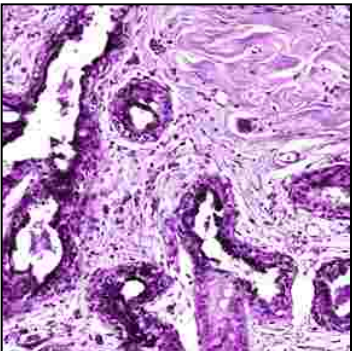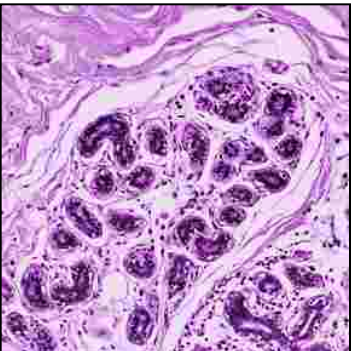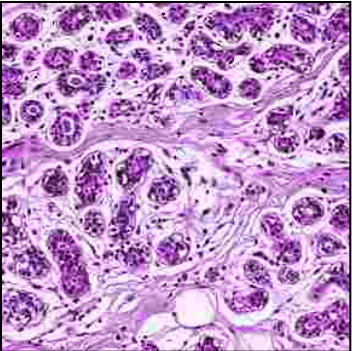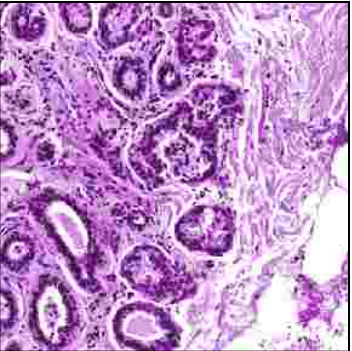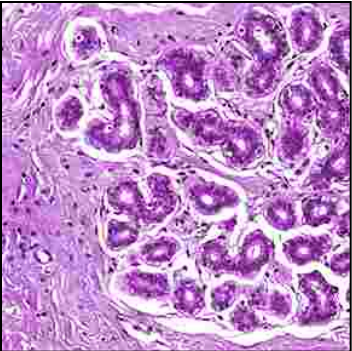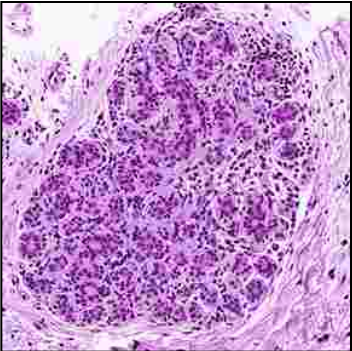



10x Cancer Monochrome 1:27 JPEG Set A

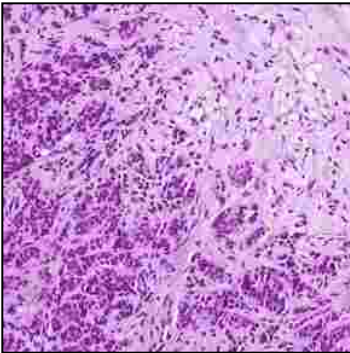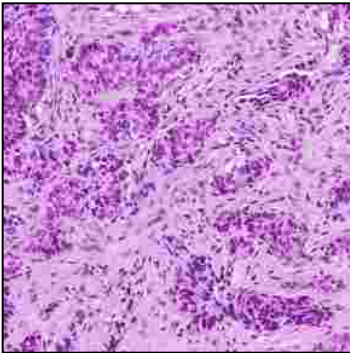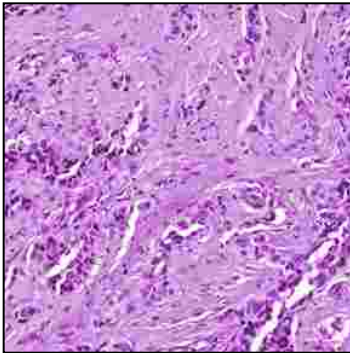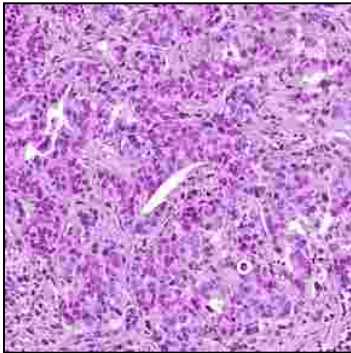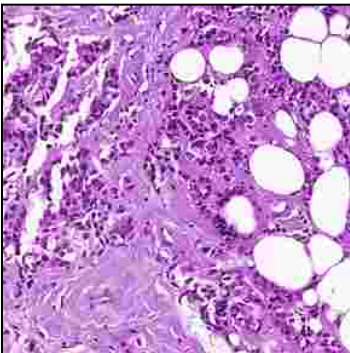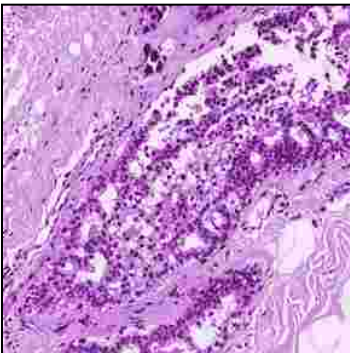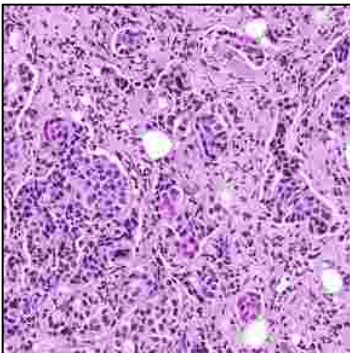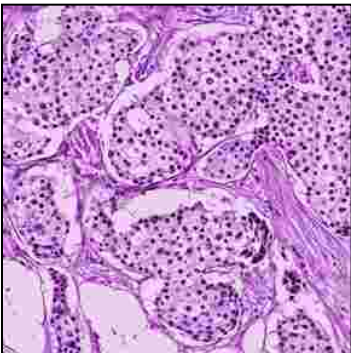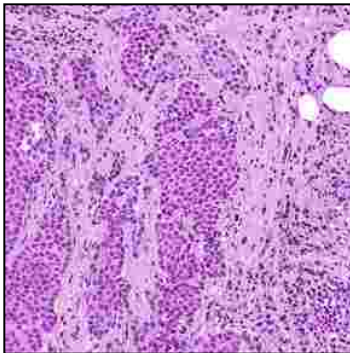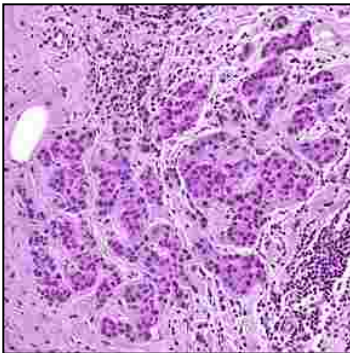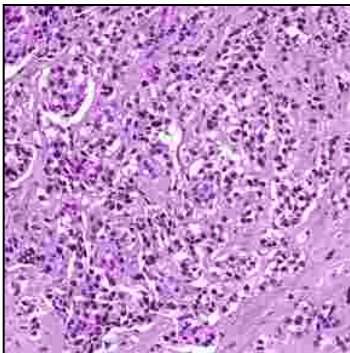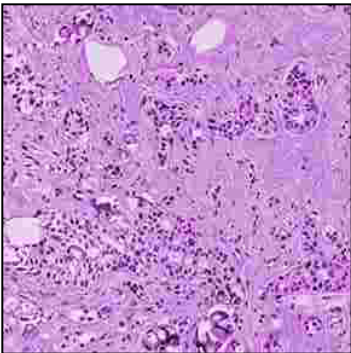



10x Cancer Monochrome 1:27 JPEG Set B

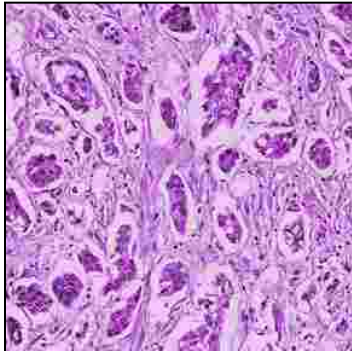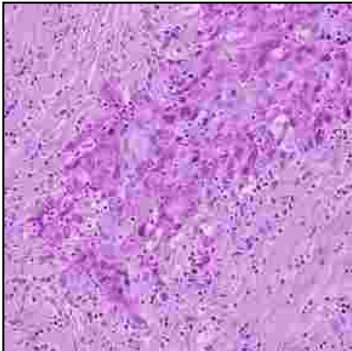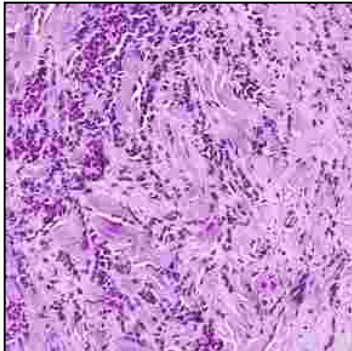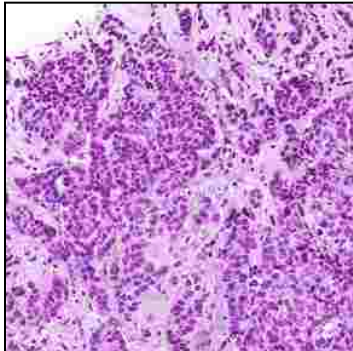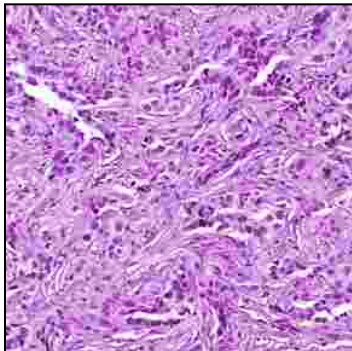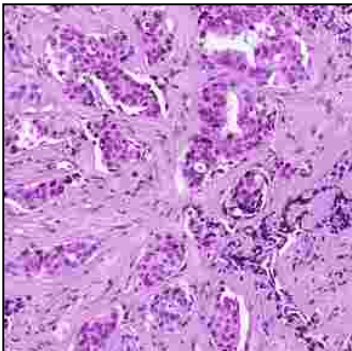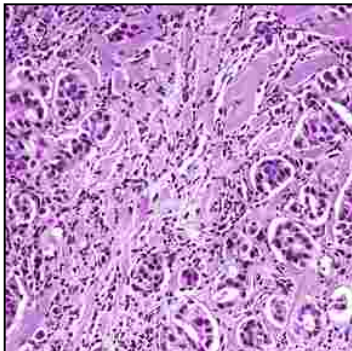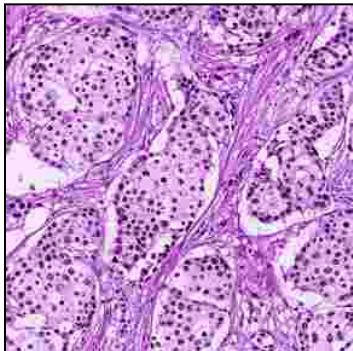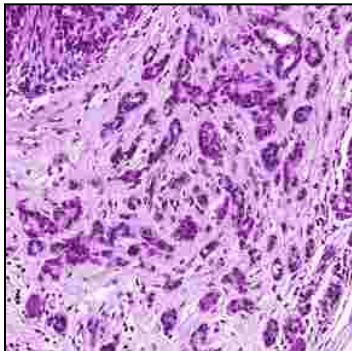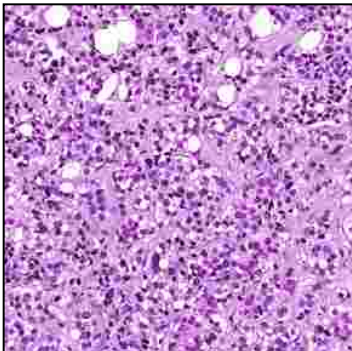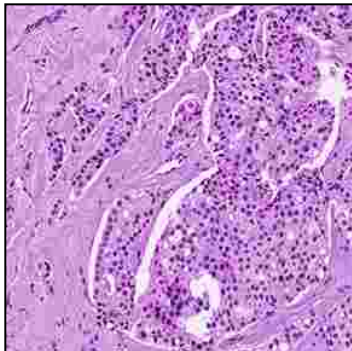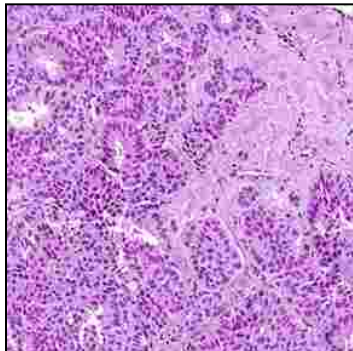

Supplement: pone.0141357.s001.pdf [file pone.0141357.s001.pdf]
