# Supplementary material for: Pigeons (Columba livia) as Trainable Observers of Pathology and Radiology Breast Cancer Images
Source: PubMed Central journal article supplement (PMC4651348; doi:10.1371/journal.pone.0141357), 2015-11-18

# Microcalcifications (-) Set A

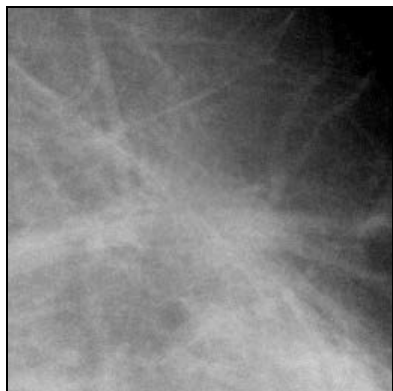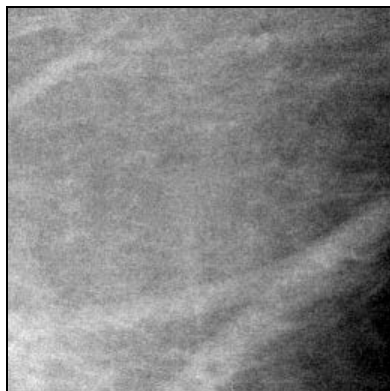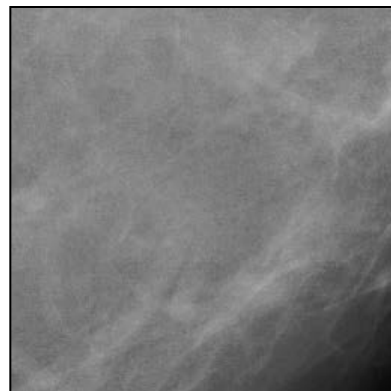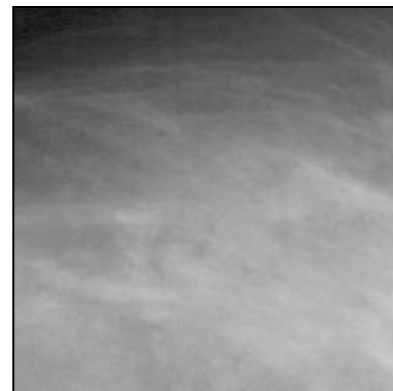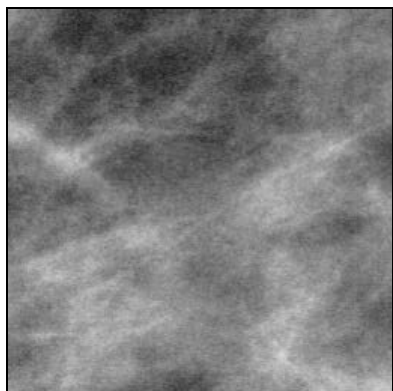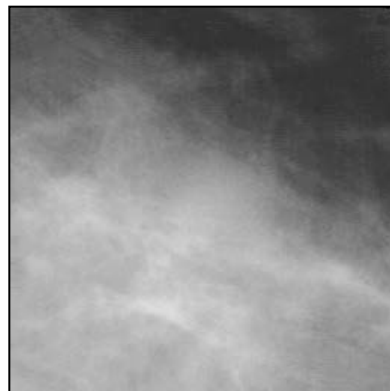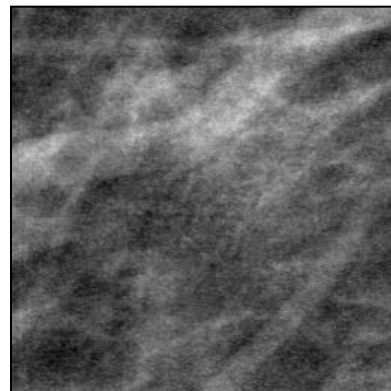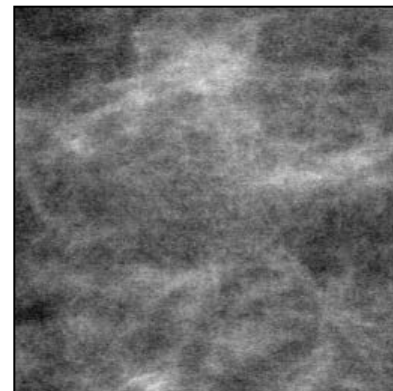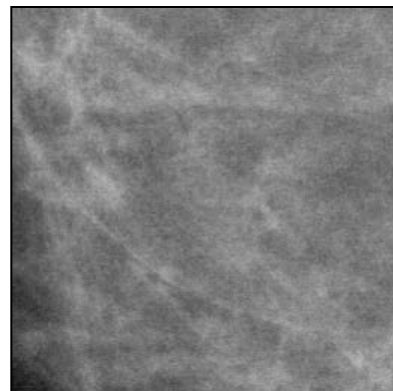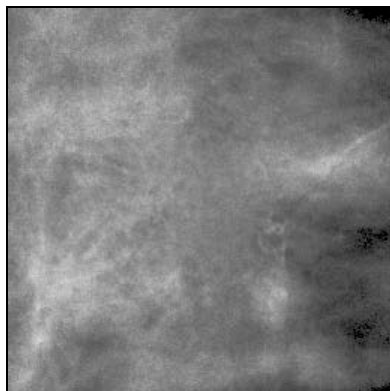

# Microcalcifications (-) Set B

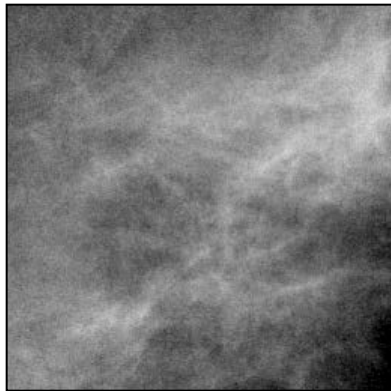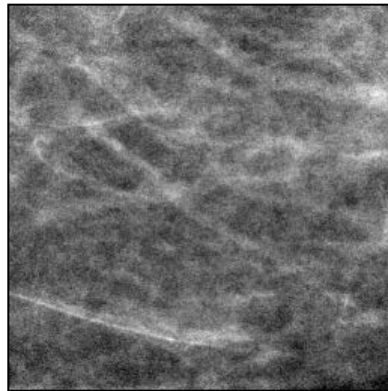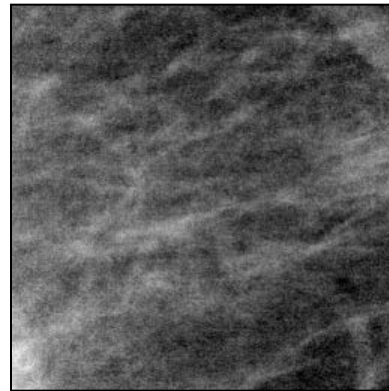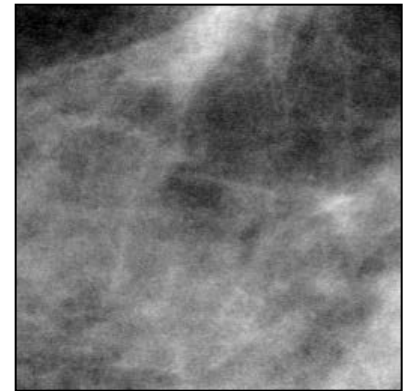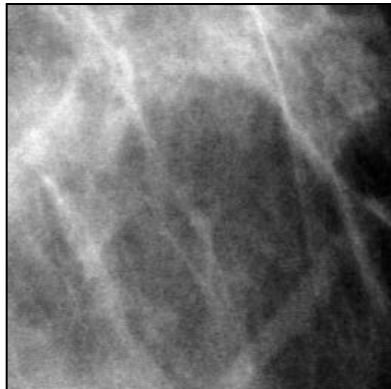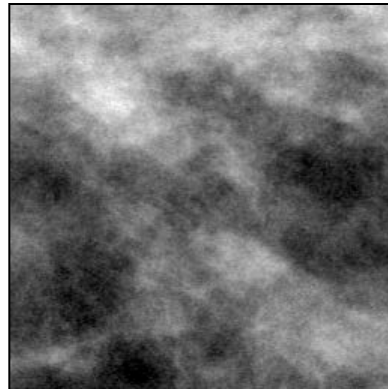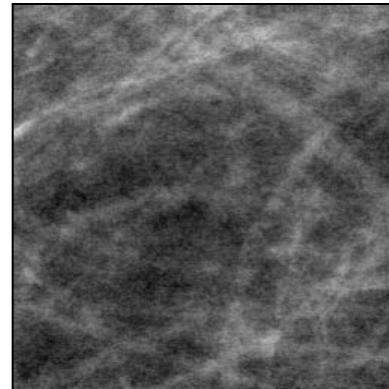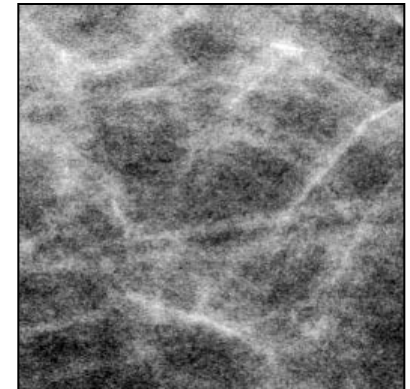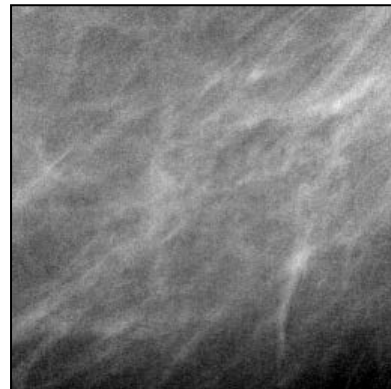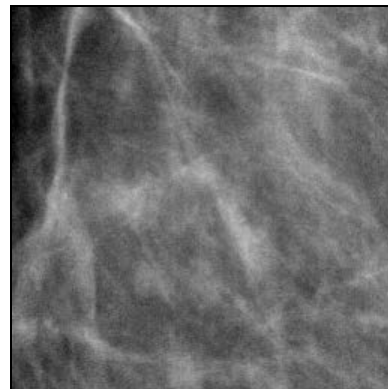

Microcalcifications (+) Set A

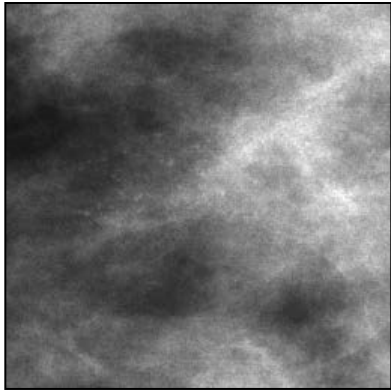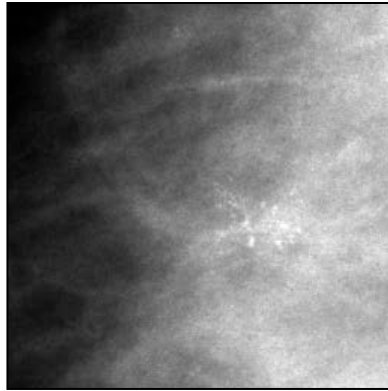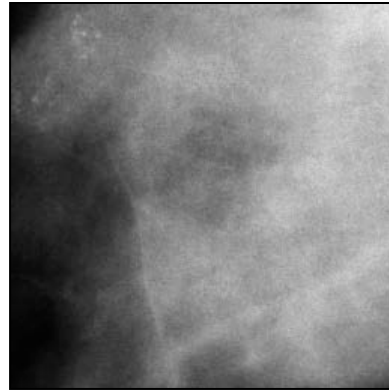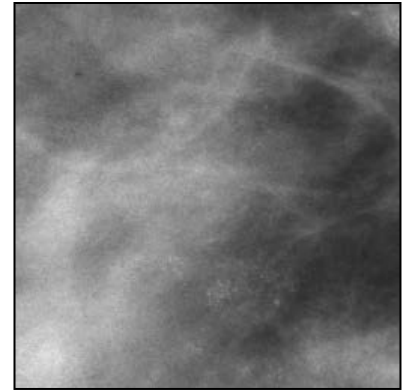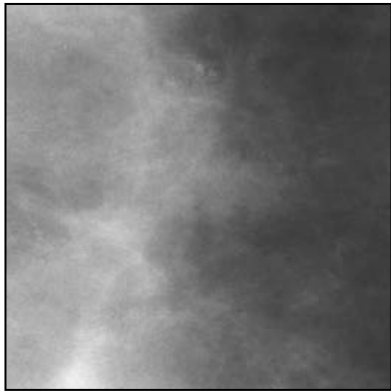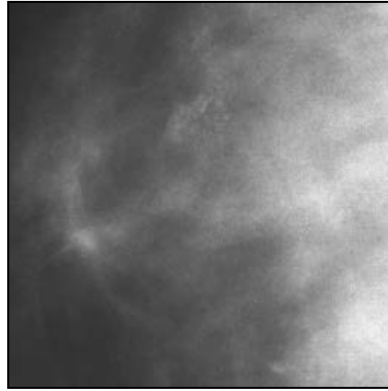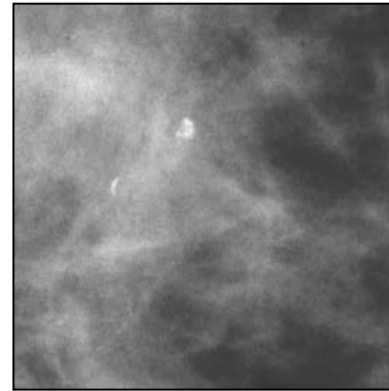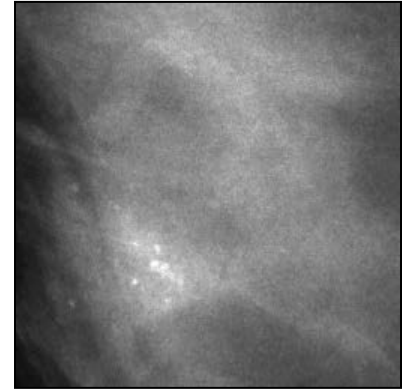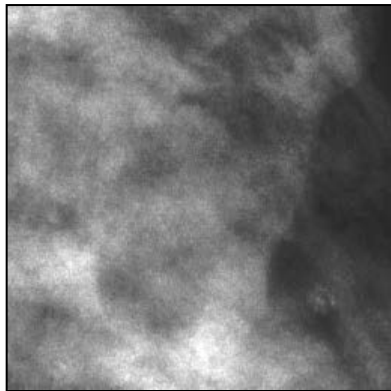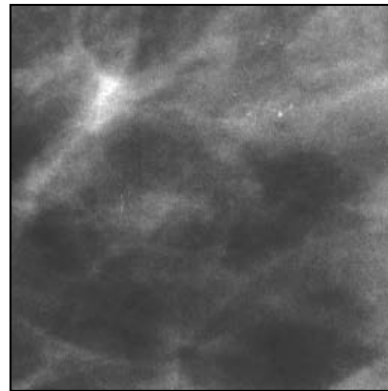

Microcalcifications (+) Set B

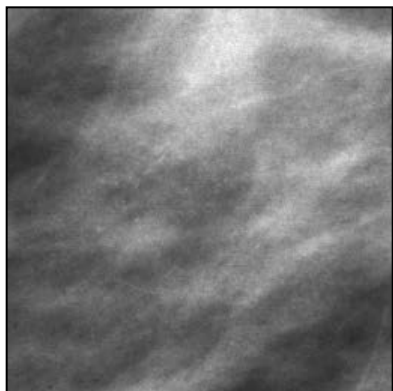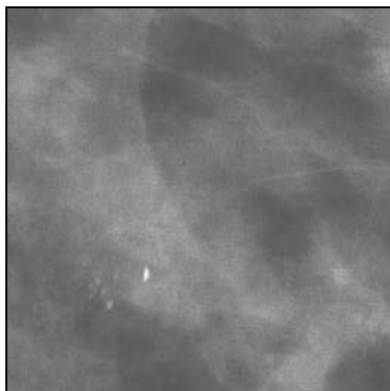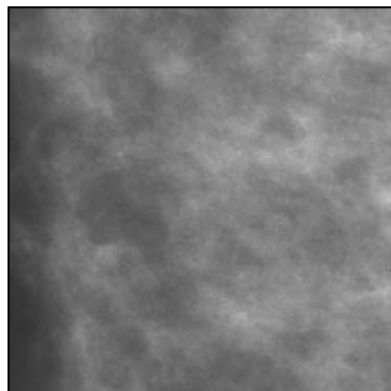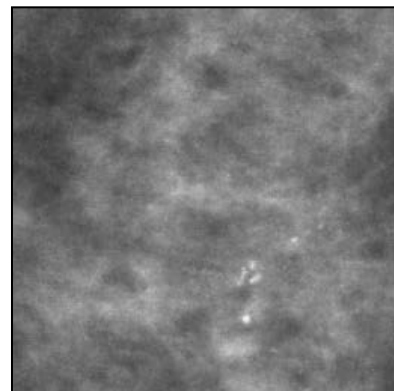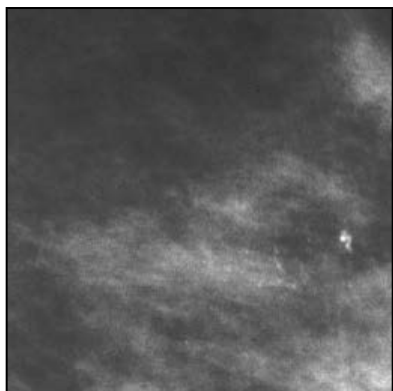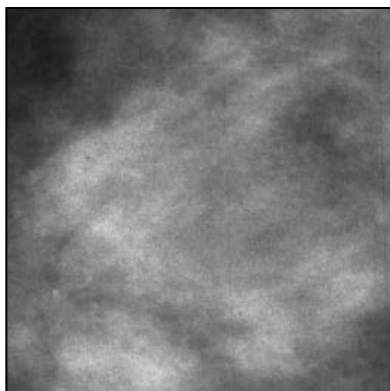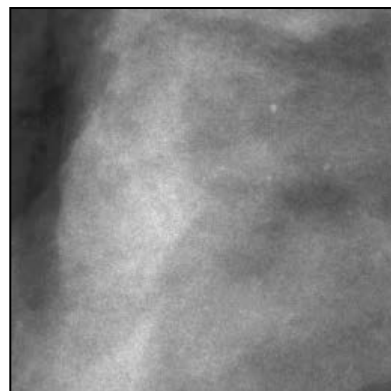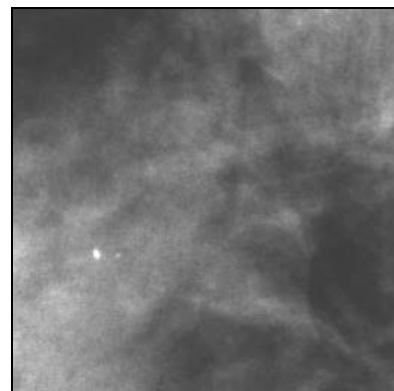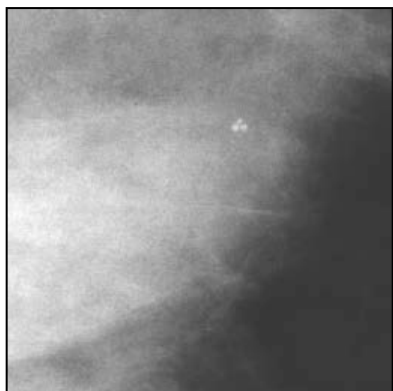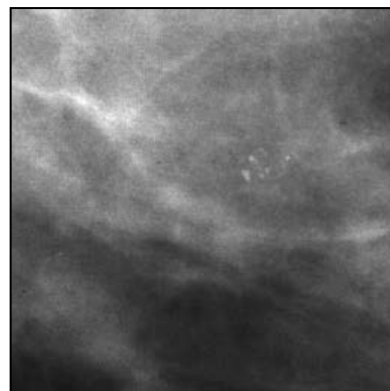

# Mammogram masses, benign--Set A

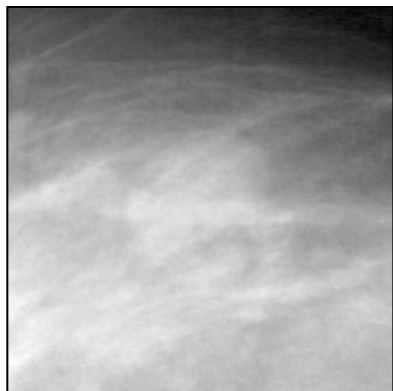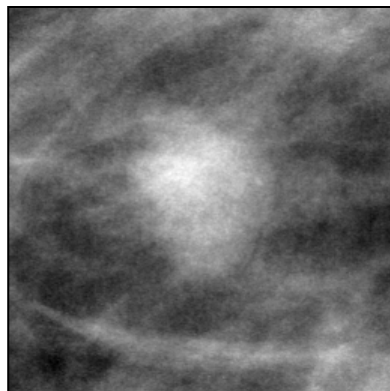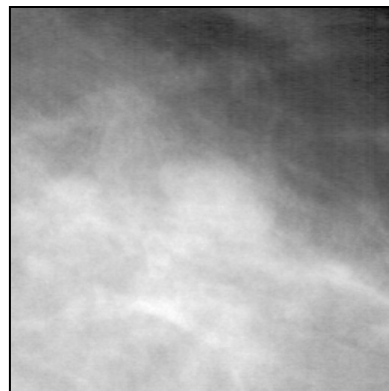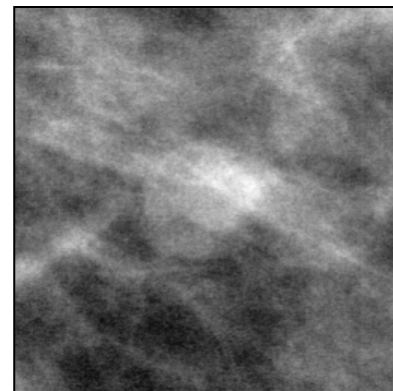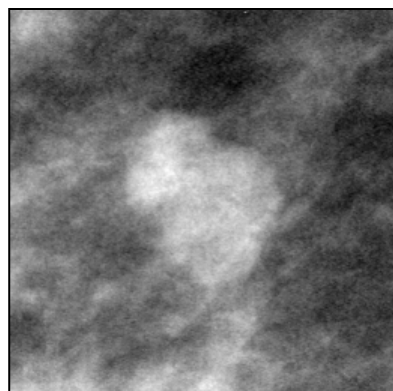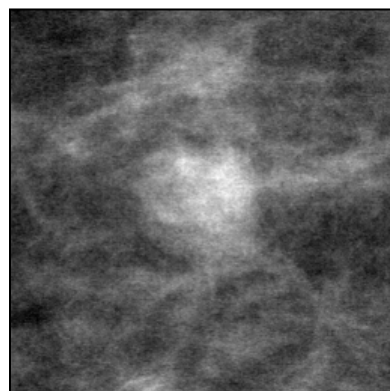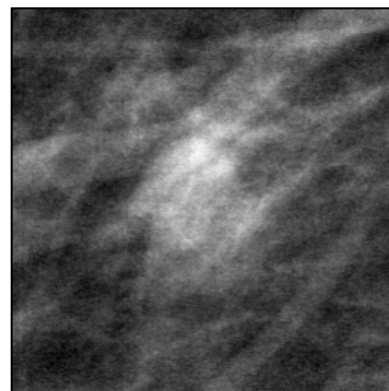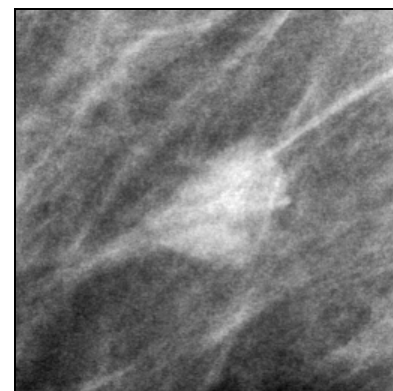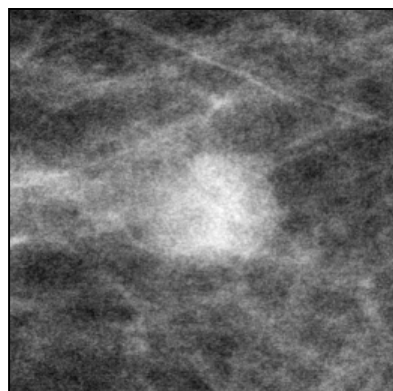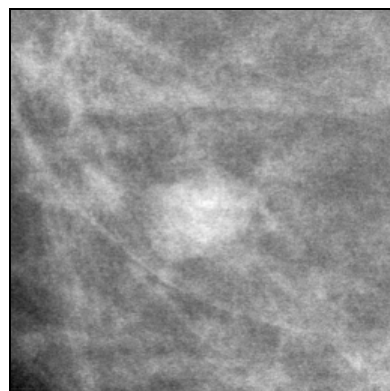

# Mammogram masses, benign--Set B

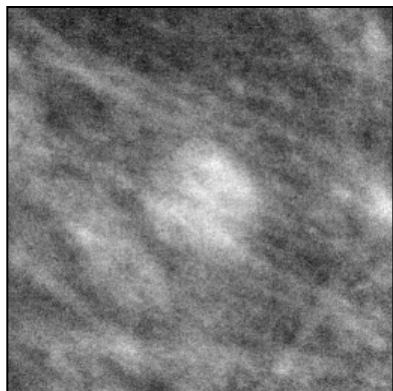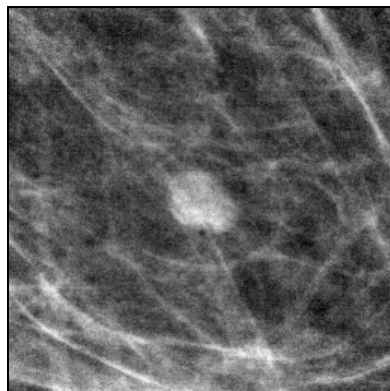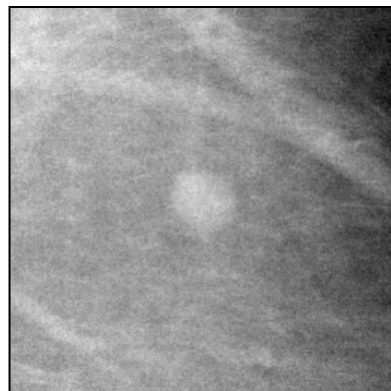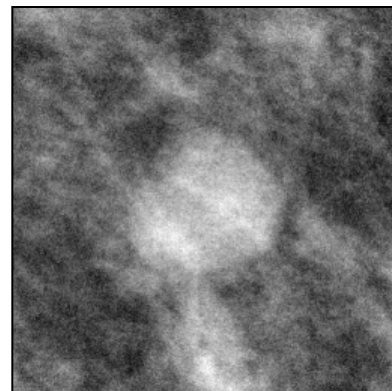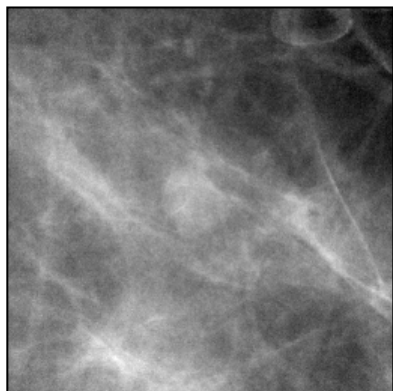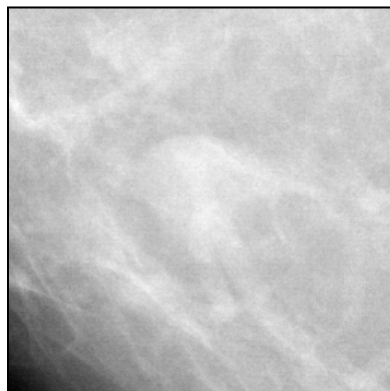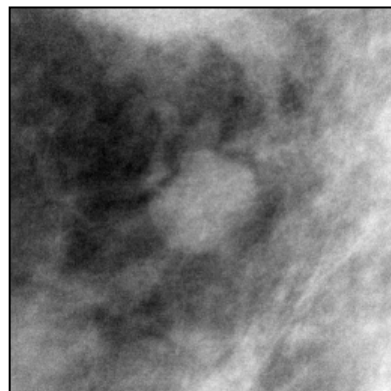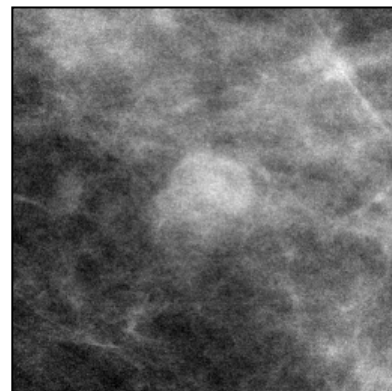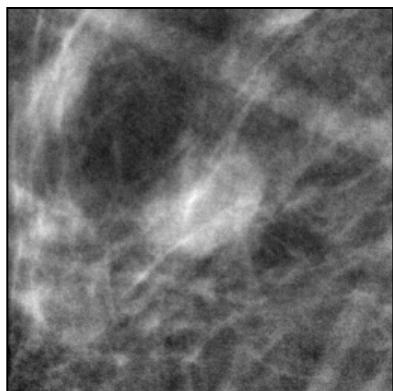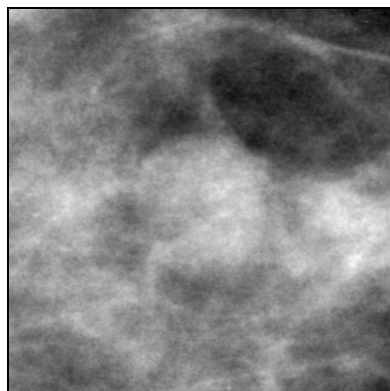



# Mammogram masses, malignant--Set A

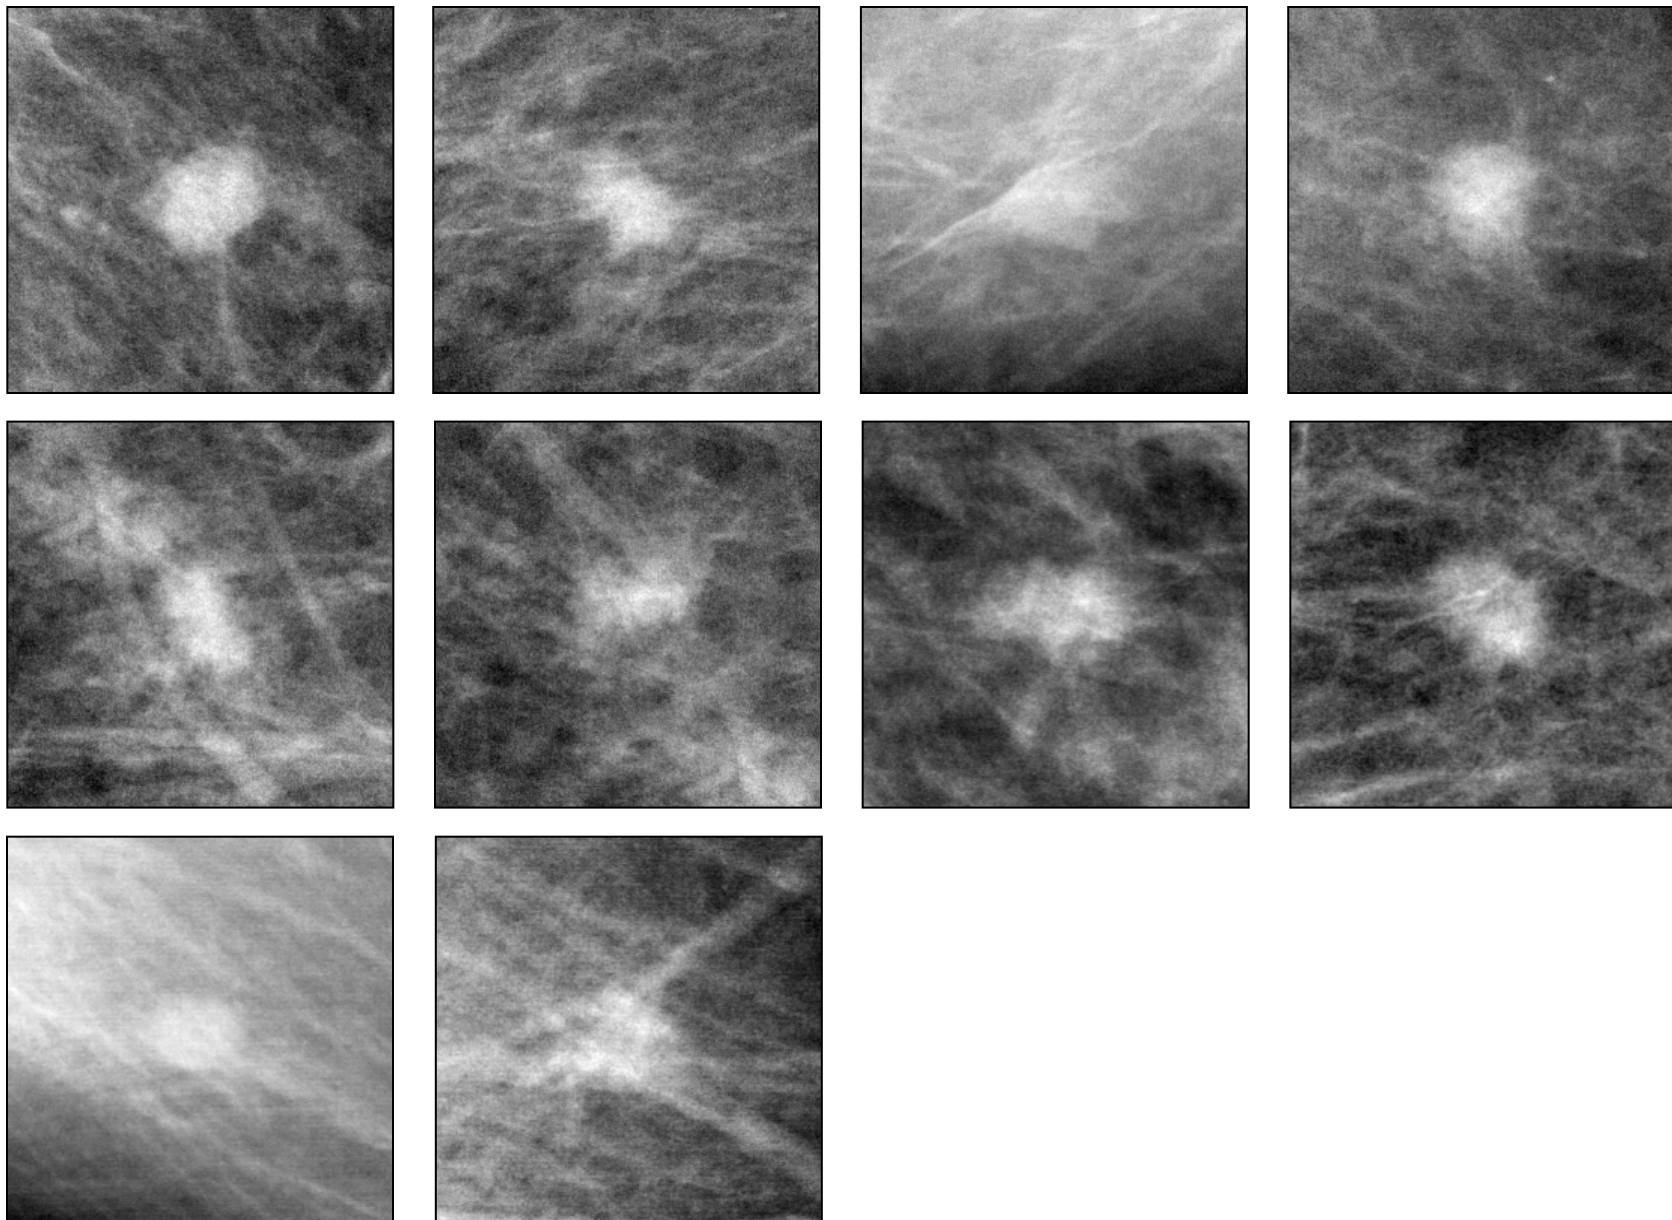

# Mammogram masses, malignant--Set B

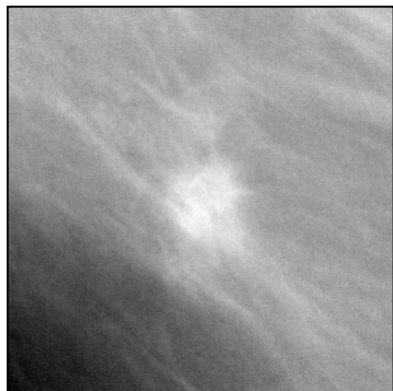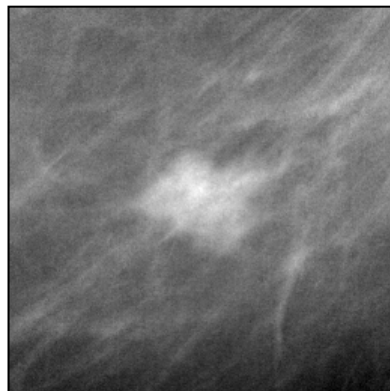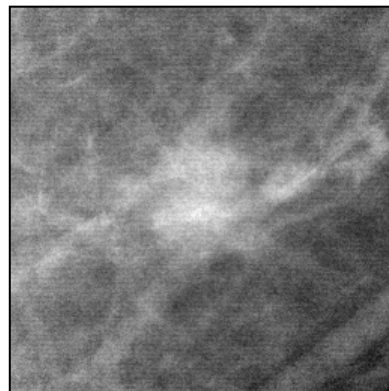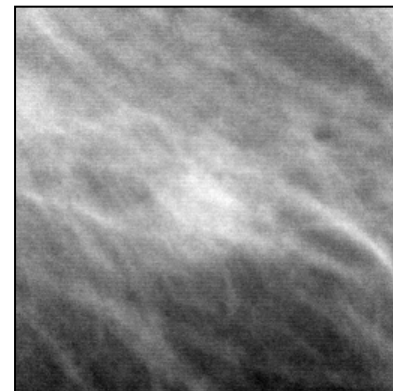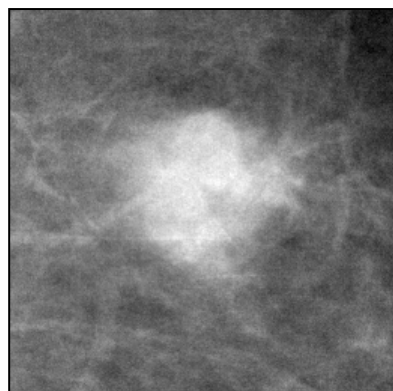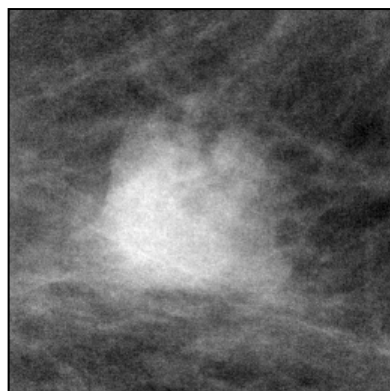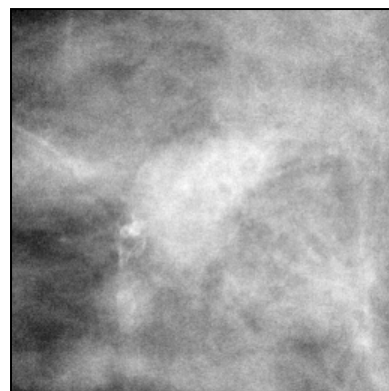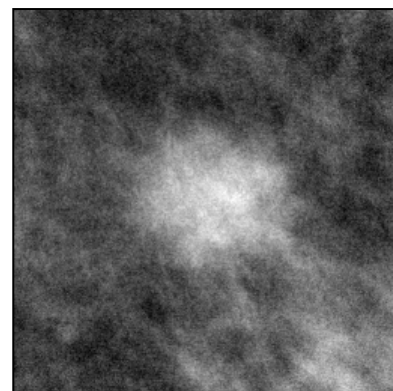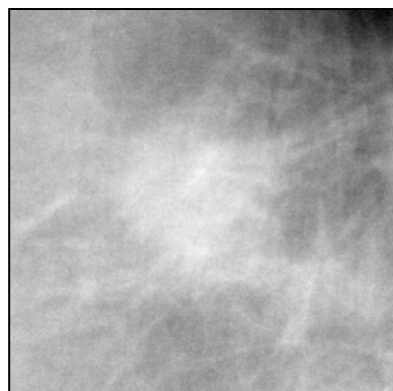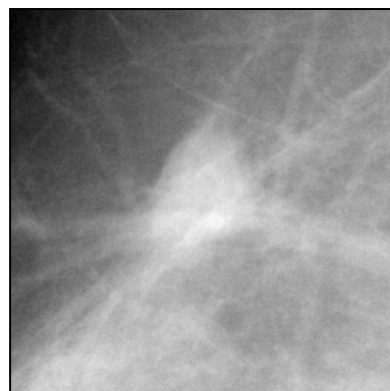

Supplement: pone.0141357.s002.pdf [file pone.0141357.s002.pdf]
